# Supplementary material for: Utilizing a Nordic Crosswalk for Occupational Coding in an Analysis on Occupation-Specific Prolonged Sickness Absence among 7 Million Employees in Denmark, Finland, Norway and Sweden
Source: Int J Environ Res Public Health. 2022 Nov 25;19(23):15674. doi: 10.3390/ijerph192315674 (PMC9737405; doi:10.3390/ijerph192315674)
Supplement: Supplementary file 1 [file ijerph-19-15674-s001.zip › ijerph-2021749-supplementary.pdf]

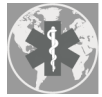

## Supplementary Material

**Table S1.** The ISCO-88 (COM) – DISCO-88 – FISCO-01 – SSYK-96 – STYRK-98 -Nordic crosswalk.

| ISCO88 (COM) Title                                                                 | ISCO-88(COM) | DISCO-88 | FISCO-01 | SSYK-96 | STYRK-98 | Nordic Code | Nordic Title                                                                             |
|------------------------------------------------------------------------------------|--------------|----------|----------|---------|----------|-------------|------------------------------------------------------------------------------------------|
| Legislators and senior government officials                                        | 1110         | 1110     | 1110     | 1110    | 1110     | 1110        | Legislators and senior government officials                                              |
|                                                                                    |              |          |          |         | 1120     |             |                                                                                          |
|                                                                                    |              |          |          | 1120    |          | 1120        | Senior officials                                                                         |
| Senior officials of political party organisations                                  | 1141         | 1141     | 1141     |         | 1141     |             |                                                                                          |
| Senior officials of employers', workers' and other economic-interest organisations | 1142         | 1142     | 1142     |         | 1142     |             |                                                                                          |
| Senior officials of humanitarian and other special-interest organisations          | 1143         | 1143     | 1143     |         | 1143     |             |                                                                                          |
| Directors and chief executives                                                     | 1210         | 1210     | 1210     | 1210    | 1210     | 1210        | Directors and chief executives                                                           |
| Production and operations managers in agriculture, hunting, forestry and fishing   | 1221         | 1221     | 1221     | 1221    | 1221     | 1221        | Production and operations managers in agriculture, hunting, forestry and fishing         |
| Production and operations managers in manufacturing                                | 1222         | 1222     | 1222     | 1222    | 1222     | 1222        | Production and operations managers in manufacturing                                      |
| Production and operations managers in construction                                 | 1223         | 1223     | 1223     | 1223    | 1223     | 1223        | Production and operations managers in construction                                       |
| Production and operations managers in wholesale and retail trade                   | 1224         | 1224     | 1224     | 1224    | 1224     | 1224        | Production and operations managers in wholesale and retail trade, restaurants and hotels |
| Production and operations managers in restaurants and hotels                       | 1225         | 1225     | 1225     |         |          |             |                                                                                          |
| Production and operations managers in transport, storage and communications        | 1226         | 1226     | 1226     |         | 1225     | 1220        | Production and operations managers in other enterprises                                  |
| Production and operations managers in business services enterprises                | 1227         | 1227     | 1227     | 1225    | 1226     |             |                                                                                          |
|                                                                                    |              |          |          | 1226    | 1227     |             |                                                                                          |
|                                                                                    |              |          |          | 1227    | 1228     |             |                                                                                          |
| Production and operations managers in personal care, cleaning and related services | 1228         | 1228     | 1228     | 1228    | 1229     | 1228        | Production and operations managers in personal care, cleaning and related services       |
| Production and operations managers not elsewhere classified                        | 1229         | 1229     | 1229     | 1229    |          | 1229        | Unspecified production and operations managers                                           |
|                                                                                    |              |          |          |         | 1220     |             |                                                                                          |
| Finance and administration managers                                                | 1231         | 1231     | 1231     | 1231    | 1231     |             |                                                                                          |

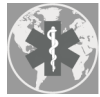

|                                                                               |      |      |      |      |      |      |                                                                                     |
|-------------------------------------------------------------------------------|------|------|------|------|------|------|-------------------------------------------------------------------------------------|
| Personnel and industrial relations managers                                   | 1232 | 1232 | 1232 | 1232 | 1232 | 1232 | Personnel and industrial relations managers                                         |
| Sales and marketing managers                                                  | 1233 | 1233 | 1233 | 1233 | 1233 | 1233 | Sales and marketing managers                                                        |
| Advertising and public relations managers                                     | 1234 | 1234 | 1234 | 1234 | 1234 | 1234 | Advertising and public relations managers                                           |
| Supply and distribution managers                                              | 1235 | 1235 | 1235 | 1235 | 1235 | 1235 | Supply and distribution managers                                                    |
| Computing services managers                                                   | 1236 | 1236 | 1236 | 1236 | 1236 | 1236 | Computing services managers                                                         |
| Research and development managers                                             | 1237 | 1237 | 1237 | 1237 | 1237 | 1237 | Research and development managers                                                   |
| Other specialist managers not elsewhere classified                            | 1239 | 1239 | 1239 | 1239 | 1239 | 1239 | Other specialist managers not elsewhere classified                                  |
| Managers of small enterprises in agriculture, hunting, forestry and fishing   | 1311 | 1311 | 1311 | 1311 | 1311 | 1311 | Managers of small enterprises in agriculture, hunting, forestry and fishing         |
| Managers of small enterprises in manufacturing                                | 1312 | 1312 | 1312 | 1312 | 1312 | 1312 | Managers of small enterprises in manufacturing                                      |
| Managers of small enterprises in construction                                 | 1313 | 1313 | 1313 | 1313 | 1313 | 1313 | Managers of small enterprises in construction                                       |
| Managers of small enterprises in wholesale and retail trade                   | 1314 | 1314 | 1314 | 1314 | 1314 | 1310 | Managers of small enterprises in wholesale and retail trade, restaurants and hotels |
| Managers of small enterprises of restaurants and hotels                       | 1315 | 1315 | 1315 |      | 1315 |      |                                                                                     |
| Managers of small enterprises in transport, storage and communications        | 1316 | 1316 | 1316 |      | 1316 | 1320 | Managers in other small enterprises                                                 |
| Managers of small enterprises in business services enterprises                | 1317 | 1317 | 1317 | 1315 | 1317 |      |                                                                                     |
|                                                                               |      |      |      | 1316 |      |      |                                                                                     |
|                                                                               |      |      |      | 1317 |      |      |                                                                                     |
| Managers of small enterprises in personal care, cleaning and related services | 1318 | 1318 | 1318 | 1318 | 1318 | 1318 | Managers of small enterprises in personal care, cleaning and related services       |
| Managers of small enterprises not elsewhere classified                        | 1319 | 1319 | 1319 | 1319 | 1319 | 1319 | Managers of unspecified small enterprises                                           |
|                                                                               |      |      |      |      | 1310 |      |                                                                                     |
| Physicists and astronomers                                                    | 2111 | 2111 | 2111 | 2111 | 2111 | 2111 | Physicists and astronomers                                                          |
| Meteorologists                                                                | 2112 | 2112 | 2112 | 2112 | 2112 | 2112 | Meteorologists                                                                      |
| Chemists                                                                      | 2113 | 2113 | 2113 | 2113 | 2113 | 2113 | Chemists                                                                            |
| Geologists and geophysicists                                                  | 2114 | 2114 | 2114 | 2114 | 2114 | 2114 | Geologists and geophysicists                                                        |
| Mathematicians and related professionals                                      | 2121 | 2121 | 2121 | 2121 | 2121 | 2121 | Mathematicians and related professionals                                            |
| Statisticians                                                                 | 2122 | 2122 | 2122 | 2122 | 2122 | 2122 | Statisticians                                                                       |
|                                                                               |      |      |      |      | 2130 | 2130 | Computing professionals                                                             |
| Computer systems designers, analysts and programmers                          | 2131 | 2131 | 2131 | 2131 |      |      |                                                                                     |
|                                                                               |      |      |      |      | 2132 |      |                                                                                     |
| Computing professionals not elsewhere classified                              | 2139 | 2139 | 2139 | 2139 |      |      |                                                                                     |
| Architects, town and traffic planners                                         | 2141 | 2141 | 2141 | 2141 | 2141 | 2141 | Architects, town and traffic planners                                               |
| Civil engineers                                                               | 2142 | 2142 | 2142 | 2142 | 2142 | 2142 | Civil engineers                                                                     |



|                                                                          |      |      |      |      |      |      |                                                                          |
|--------------------------------------------------------------------------|------|------|------|------|------|------|--------------------------------------------------------------------------|
| Electrical engineers                                                     | 2143 | 2143 | 2143 | 2143 | 2143 | 2143 | Electrical engineers                                                     |
| Electronics and telecommunications engineers                             | 2144 | 2144 | 2144 | 2144 | 2144 | 2144 | Electronics and telecommunications engineers                             |
| Mechanical engineers                                                     | 2145 | 2145 | 2145 | 2145 | 2145 | 2145 | Mechanical engineers                                                     |
| Chemical engineers                                                       | 2146 | 2146 | 2146 | 2146 | 2146 | 2146 | Chemical engineers                                                       |
| Mining engineers, metallurgists and related professionals                | 2147 | 2147 | 2147 | 2147 | 2147 | 2147 | Mining engineers, metallurgists and related professionals                |
| Cartographers and surveyors                                              | 2148 | 2148 | 2148 | 2148 | 2148 | 2148 | Cartographers and surveyors                                              |
| Architects, engineers and related professionals not elsewhere classified | 2149 | 2149 | 2149 | 2149 | 2149 | 2149 | Architects, engineers and related professionals not elsewhere classified |
| Biologists, botanists, zoologists and related professionals              | 2211 | 2211 | 2211 | 2211 | 2211 | 2211 | Biologists, botanists, zoologists and related professionals              |
| Pharmacologists, pathologists and related professionals                  | 2212 | 2212 | 2212 | 2212 |      | 2212 | Pharmacologists, pharmacists, pathologists and related professionals     |
| Pharmacists                                                              | 2224 | 2224 | 2224 | 2224 | 2224 |      |                                                                          |
| Agronomists and related professionals                                    | 2213 | 2213 | 2213 | 2213 | 2212 |      | Agronomists and related professionals                                    |
|                                                                          |      |      |      |      | 2214 |      |                                                                          |
| Medical doctors                                                          | 2221 | 2221 | 2221 | 2221 | 2221 | 2221 | Medical doctors                                                          |
| Dentists                                                                 | 2222 | 2222 | 2222 | 2222 | 2222 | 2222 | Dentists                                                                 |
| Veterinarians                                                            | 2223 | 2223 | 2223 | 2223 | 2223 | 2223 | Veterinarians                                                            |
| Health professionals (except nursing) not elsewhere classified           | 2229 | 2229 | 2229 | 2229 | 2225 | 2229 | Unspecified health professionals (except nursing)                        |
| Nursing and midwifery professionals                                      | 2230 | 2230 | 2230 |      | 2230 |      | Nursing and midwifery professionals                                      |
|                                                                          |      |      |      | 2231 |      |      |                                                                          |
|                                                                          |      |      |      | 2232 |      |      |                                                                          |
|                                                                          |      |      |      | 2233 |      |      |                                                                          |
|                                                                          |      |      |      | 2234 |      |      |                                                                          |
|                                                                          |      |      |      | 2235 |      |      |                                                                          |
|                                                                          |      |      |      | 2236 |      |      |                                                                          |
|                                                                          |      |      |      | 3232 |      |      |                                                                          |
| College, university and higher education teaching professionals          | 2310 | 2310 | 2310 | 2310 | 2310 | 2310 | College, university and higher education teaching professionals          |
| Secondary education teaching professionals                               | 2320 | 2320 |      |      | 2320 |      | Secondary education teaching professionals                               |
|                                                                          |      |      | 2321 | 2321 |      |      |                                                                          |
|                                                                          |      |      | 2322 | 2322 |      |      |                                                                          |
|                                                                          |      |      | 2323 | 2323 |      |      |                                                                          |
|                                                                          |      |      |      | 2330 |      | 2330 |                                                                          |



|                                                         |      |      |      |      |      |                                                                      |
|---------------------------------------------------------|------|------|------|------|------|----------------------------------------------------------------------|
| Primary education teaching professionals                | 2331 | 2331 | 2331 | 3310 |      | Primary education teaching professionals and associate professionals |
| Special education teaching professionals                | 2340 | 2340 | 2340 | 2340 | 2340 | Special education teaching professionals                             |
| Education methods specialists                           | 2351 | 2351 | 2351 | 2351 | 2351 | Education methods specialists and school inspectors                  |
| School inspectors                                       | 2352 | 2352 | 2352 | 2352 | 2352 |                                                                      |
| Other teaching professionals not elsewhere classified   | 2359 | 2359 | 2359 | 2359 | 2359 | Unspecified teaching professionals                                   |
| Accountants                                             | 2411 | 2411 | 2411 | 2411 | 2511 | Accountants                                                          |
| Personnel and careers professionals                     | 2412 | 2412 | 2412 | 2412 | 2512 | Personnel and careers professionals                                  |
|                                                         |      |      |      | 2413 |      | Other business professionals                                         |
|                                                         |      |      |      | 2414 |      |                                                                      |
| Business professionals not elsewhere classified         | 2419 | 2419 | 2419 | 2419 | 2519 |                                                                      |
|                                                         |      |      |      | 2480 |      |                                                                      |
| Lawyers                                                 | 2421 | 2421 | 2421 | 2421 | 2521 | Lawyers                                                              |
| Judges                                                  | 2422 | 2422 | 2422 | 2422 | 2522 | Judges                                                               |
|                                                         |      |      |      | 2423 |      | Unspecified legal professionals                                      |
| Legal professionals not elsewhere classified            | 2429 | 2429 | 2429 | 2429 | 2523 |                                                                      |
| Archivists and curators                                 | 2431 | 2431 | 2431 | 2431 | 2531 | Archivists and curators                                              |
| Librarians and related information professionals        | 2432 | 2432 | 2432 | 2432 | 2532 | Librarians and related information professionals                     |
|                                                         |      |      |      | 3493 |      |                                                                      |
| Economists                                              | 2441 | 2441 | 2441 | 2441 | 2541 | Economists                                                           |
| Sociologists, anthropologists and related professionals | 2442 | 2442 | 2442 | 2442 | 2542 | Sociologists, anthropologists and related professionals              |
| Philosophers, historians and political scientists       | 2443 | 2443 | 2443 | 2443 | 2543 | Philosophers, historians and political scientists                    |
| Philologists, translators and interpreters              | 2444 | 2444 | 2444 | 2444 | 2544 | Philologists, translators and interpreters                           |
| Psychologists                                           | 2445 | 2445 | 2445 | 2491 | 2545 | Psychologists                                                        |
|                                                         |      |      |      | 2225 |      |                                                                      |
| Social work professionals                               | 2446 | 2446 | 2446 | 2492 |      | Social work professionals                                            |
| Authors, journalists and other writers                  | 2451 | 2451 | 2451 | 2451 | 2551 | Authors, journalists and other writers                               |
|                                                         |      |      |      |      | 3491 |                                                                      |
| Sculptors, painters and related artists                 | 2452 | 2452 | 2452 | 2452 | 2552 | Sculptors, painters and related artists                              |
|                                                         |      |      |      | 2456 |      |                                                                      |
| Composers, musicians and singers                        | 2453 | 2453 | 2453 | 2453 | 2553 | Composers, musicians and singers                                     |
| Choreographers and dancers                              | 2454 | 2454 | 2454 | 2454 | 2554 | Choreographers and dancers                                           |
| Film, stage and related actors and directors            | 2455 | 2455 | 2455 | 2455 | 2555 | Film, stage and related actors and directors                         |
| Religious professionals                                 | 2460 | 2460 | 2460 | 2460 | 2560 | Religious professionals                                              |
| Public service administrative professionals             | 2470 | 2470 | 2470 | 2470 |      | Public service administrative professionals                          |



|                                                                       |      |      |      |      |      |      |                                                                                        |
|-----------------------------------------------------------------------|------|------|------|------|------|------|----------------------------------------------------------------------------------------|
|                                                                       |      |      |      |      | 2411 |      |                                                                                        |
|                                                                       |      |      |      |      | 2412 |      |                                                                                        |
|                                                                       |      |      |      |      | 2413 |      |                                                                                        |
|                                                                       |      |      |      |      | 2419 |      |                                                                                        |
| Chemical and physical science technicians                             | 3111 | 3111 | 3111 | 3111 |      | 3110 | Chemical, physical science and engineering technicians                                 |
| Chemical engineering technicians                                      | 3116 | 3116 | 3116 | 3116 | 3115 |      |                                                                                        |
| Civil engineering technicians                                         | 3112 | 3112 | 3112 | 3112 | 3111 | 3112 | Civil engineering technicians                                                          |
| Electrical engineering technicians                                    | 3113 | 3113 | 3113 | 3113 | 3112 | 3113 | Electrical engineering technicians                                                     |
| Electronics and telecommunications engineering technicians            | 3114 | 3114 | 3114 | 3114 | 3113 | 3114 | Electronics and telecommunications engineering technicians                             |
| Mechanical engineering technicians                                    | 3115 | 3115 | 3115 | 3115 | 3114 | 3115 | Mechanical engineering technicians                                                     |
| Mining and metallurgical technicians                                  | 3117 | 3117 | 3117 | 3117 | 3116 | 3117 | Mining and metallurgical technicians                                                   |
| Draughtspersons                                                       | 3118 | 3118 | 3118 | 3118 |      |      |                                                                                        |
| Physical and engineering science technicians not elsewhere classified | 3119 | 3119 | 3119 | 3119 | 3119 | 3119 | Draughtspersons and unspecified physical and engineering science technicians           |
|                                                                       |      |      | 3120 |      | 3120 |      |                                                                                        |
| Computer assistants                                                   | 3121 | 3121 |      | 3121 |      | 3120 | Computing associate professionals                                                      |
| Computer equipment operators                                          | 3122 | 3122 |      | 3122 |      |      |                                                                                        |
| Industrial robot controllers                                          | 3123 | 3123 |      |      |      |      |                                                                                        |
| Photographers and image and sound recording equipment operators       | 3131 | 3131 | 3131 | 3131 | 3131 | 3130 | Photographers and image and sound recording equipment operators                        |
|                                                                       |      |      |      | 3132 |      |      |                                                                                        |
| Broadcasting and telecommunications equipment operators               | 3132 | 3132 | 3132 | 3133 | 3132 | 3132 | Broadcasting and telecommunications equipment operators                                |
| Medical Equipment Operators                                           | 3133 | 3133 |      | 3134 |      | 3139 | Medical equipment operators and unspecified optical and electronic equipment operators |
| Optical and electronic equipment operators not elsewhere classified   | 3139 | 3139 | 3139 |      | 3139 |      |                                                                                        |
| Ships' engineers                                                      | 3141 | 3141 | 3141 | 3141 | 3141 | 3141 | Ships' engineers                                                                       |
| Ships' deck officers and pilots                                       | 3142 | 3142 | 3142 | 3142 | 3142 | 3142 | Ships' deck officers and pilots                                                        |
| Aircraft pilots and related associate professionals                   | 3143 | 3143 | 3143 | 3143 | 3143 | 3143 | Aircraft pilots and related associate professionals                                    |
| Air traffic controllers                                               | 3144 | 3144 | 3144 | 3144 | 3144 | 3140 | Air traffic controllers and safety technicians                                         |
| Air traffic safety technicians                                        | 3145 | 3145 | 3145 | 3145 |      |      |                                                                                        |
| Building and fire inspectors                                          | 3151 | 3151 | 3151 | 3151 | 3151 | 3151 | Building and fire inspectors                                                           |
| Safety, health and quality inspectors                                 | 3152 | 3152 | 3152 | 3152 | 3152 | 3152 | Safety, health and quality inspectors                                                  |
| Life science technicians                                              | 3211 | 3211 | 3211 | 3240 | 3211 | 3210 | Life science technicians                                                               |



|                                                                          |      |      |      |      |      |      |                                                                          |
|--------------------------------------------------------------------------|------|------|------|------|------|------|--------------------------------------------------------------------------|
|                                                                          |      |      |      |      | 7450 |      |                                                                          |
| Agronomy and forestry technicians                                        | 3212 | 3212 | 3212 | 3211 | 3212 | 3212 | Agronomy and forestry technicians                                        |
| Farming and forestry advisers                                            | 3213 | 3213 | 3213 | 3212 | 3213 | 3213 | Farming and forestry advisers                                            |
| Medical Assistants                                                       | 3221 | 3221 |      | 3221 | 3221 | 3220 | Medical assistants, hygienists, health and environmental officers        |
| Hygienists, health and environmental officers                            | 3222 | 3222 | 3222 | 3222 | 3222 |      |                                                                          |
| Dieticians and nutritionists                                             | 3223 | 3223 | 3223 | 3223 | 3223 | 3223 | Dieticians and nutritionists                                             |
| Optometrists and opticians                                               | 3224 | 3224 | 3224 | 3224 | 3224 | 3224 | Optometrists and opticians                                               |
| Dental assistants                                                        | 3225 | 3225 | 3225 | 3225 | 3225 | 3225 | Dental assistants                                                        |
| Physiotherapists and related associate professionals                     | 3226 | 3226 | 3226 | 3226 | 3226 | 3226 | Physiotherapists and related associate professionals                     |
| Veterinary assistants                                                    | 3227 | 3227 | 3227 | 3227 | 3227 | 3227 | Veterinary assistants                                                    |
| Pharmaceutical assistants                                                | 3228 | 3228 | 3228 | 3228 | 3228 | 3228 | Pharmaceutical assistants                                                |
|                                                                          |      |      |      |      | 5137 |      |                                                                          |
| Health associate professionals (except nursing) not elsewhere classified | 3229 | 3229 | 3229 | 3229 | 3229 | 3229 | Health associate professionals (except nursing) not elsewhere classified |
| Nursing associate professionals                                          | 3231 | 3231 | 3231 | 3231 | 3231 | 3230 | Nursing and midwifery associate professionals                            |
| Midwifery associate professionals                                        | 3232 |      | 3232 |      |      |      |                                                                          |
|                                                                          |      |      |      | 3233 |      |      |                                                                          |
|                                                                          |      |      |      | 3234 | 3232 |      |                                                                          |
|                                                                          |      |      |      | 3235 |      |      |                                                                          |
|                                                                          |      |      |      | 3239 |      |      |                                                                          |
| Pre-primary education teaching professionals                             | 2332 |      | 2332 |      |      | 3320 | Pre-primary education teaching professionals and associate professionals |
| Primary education teaching associate professionals                       | 3310 | 3310 |      |      |      |      |                                                                          |
| Pre-primary education teaching associate professionals                   | 3320 | 3320 |      | 3310 | 3320 |      |                                                                          |
| Special education teaching associate professionals                       | 3330 | 3330 |      |      |      | 3330 | Special education teaching associate professionals                       |
| Other teaching associate professionals                                   | 3340 | 3340 | 3340 | 3320 |      | 3340 | Other teaching associate professionals                                   |
|                                                                          |      |      |      |      | 3341 |      |                                                                          |
|                                                                          |      |      |      |      | 3349 |      |                                                                          |
| Securities and finance dealers and brokers                               | 3411 | 3411 | 3411 | 3411 | 3411 | 3411 | Securities and finance dealers and brokers                               |
| Insurance representatives                                                | 3412 | 3412 | 3412 | 3412 | 3412 | 3412 | Insurance representatives                                                |
| Estate agents                                                            | 3413 | 3413 | 3413 | 3413 | 3413 | 3413 | Estate agents                                                            |
| Travel consultants and organisers                                        | 3414 | 3414 | 3414 | 3414 | 3414 | 3414 | Travel consultants and organisers                                        |
| Technical and commercial sales representatives                           | 3415 | 3415 | 3415 | 3415 | 3415 | 3415 | Technical and commercial sales representatives                           |
|                                                                          |      |      |      |      | 5224 |      |                                                                          |
| Buyers                                                                   | 3416 | 3416 | 3416 | 3416 | 3416 | 3416 | Buyers                                                                   |
| Appraisers, valuers and auctioneers                                      | 3417 | 3417 | 3417 | 3417 | 3417 | 3417 | Appraisers, valuers and auctioneers                                      |



|                                                                                      |      |      |      |      |      |      |                                                                     |
|--------------------------------------------------------------------------------------|------|------|------|------|------|------|---------------------------------------------------------------------|
|                                                                                      |      |      |      | 3418 | 3418 |      |                                                                     |
| Finance and sales associate professionals not elsewhere classified                   | 3419 | 3419 | 3419 | 3419 | 3419 | 3410 | Unspecified finance and sales associate professionals               |
| Trade brokers                                                                        | 3421 | 3421 | 3421 | 3421 | 3421 | 3421 | Trade brokers                                                       |
| Clearing and forwarding agents                                                       | 3422 | 3422 | 3422 | 3422 | 3422 | 3422 | Clearing and forwarding agents                                      |
| Employment agents and labour contractors                                             | 3423 | 3423 | 3423 | 3423 | 3423 | 3423 | Employment agents and labour contractors                            |
| Business services agents and trade brokers not elsewhere classified                  | 3429 | 3429 | 3429 | 3429 | 3429 | 3429 | Business services agents and trade brokers not elsewhere classified |
| Administrative secretaries and related associate professionals                       | 3431 | 3431 | 3431 | 3431 | 3431 | 3431 | Administrative secretaries and related associate professionals      |
| Legal and related business associate professionals                                   | 3432 | 3432 | 3432 | 3432 |      |      |                                                                     |
| Bookkeepers                                                                          | 3433 | 3433 | 3433 | 3433 | 3432 |      |                                                                     |
|                                                                                      |      |      |      |      | 3433 |      |                                                                     |
| Statistical, mathematical and related associate professionals                        | 3434 | 3434 | 3434 |      |      | 3430 | Other administrative associate professionals                        |
| Administrative associate professionals not elsewhere classified                      | 3439 | 3439 |      |      |      |      |                                                                     |
| Customs and border inspectors                                                        | 3441 | 3441 | 3441 | 3441 | 3441 | 3441 | Customs and border inspectors                                       |
| Government tax and excise officials                                                  | 3442 | 3442 | 3442 | 3442 | 3442 | 3442 | Government tax and excise officials                                 |
| Government social benefits officials                                                 | 3443 | 3443 | 3443 | 3443 | 3443 | 3443 | Government social benefits officials                                |
| Government licensing officials                                                       | 3444 | 3444 |      |      | 3444 |      |                                                                     |
| Customs, tax and related government associate professionals not elsewhere classified | 3449 | 3449 |      | 3449 | 3449 | 3440 | Other government associate professionals                            |
| Police inspectors and detectives                                                     | 3450 | 3450 | 3450 |      |      | 3450 | Police inspectors and detectives                                    |
| Social work associate professionals                                                  | 3460 | 3460 | 3460 |      | 3460 |      |                                                                     |
|                                                                                      |      |      |      | 3461 |      | 3460 | Social work associate professionals                                 |
|                                                                                      |      |      |      | 3462 |      |      |                                                                     |
| Decorators and commercial designers                                                  | 3471 | 3471 | 3471 | 3471 | 3471 | 3471 | Decorators and commercial designers                                 |
| Radio, television and other announcers                                               | 3472 | 3472 | 3472 | 3472 | 3492 | 3472 | Radio, television and other announcers                              |
| Street, night-club and related musicians, singers and dancers                        | 3473 | 3473 | 3473 | 3473 | 3472 | 3473 | Street, night-club and related musicians, singers and dancers       |
| Clowns, magicians, acrobats and related associate professionals                      | 3474 | 3474 | 3474 | 3474 | 3473 |      |                                                                     |
|                                                                                      |      |      |      |      | 3474 | 3470 | Clowns, magicians, acrobats and related associate professionals     |
|                                                                                      |      |      |      | 3476 |      |      |                                                                     |



|                                                              |      |      |      |      |      |      |                                                              |
|--------------------------------------------------------------|------|------|------|------|------|------|--------------------------------------------------------------|
| Athletes, sports persons and related associate professionals | 3475 | 3475 | 3475 | 3475 | 3475 | 3475 | Athletes, sports persons and related associate professionals |
| Religious associate professionals                            | 3480 | 3480 | 3480 | 3480 | 3480 | 3480 | Religious associate professionals                            |
| Stenographers and typists                                    | 4111 | 4111 |      |      | 4111 | 4111 | Keyboard-operating clerks                                    |
| Word-processor and related operators                         | 4112 | 4112 | 4112 |      |      |      |                                                              |
| Data entry operators                                         | 4113 | 4113 | 4113 | 4111 | 4112 |      |                                                              |
| Calculating-machine operators                                | 4114 | 4114 | 4114 |      |      |      |                                                              |
| Secretaries                                                  | 4115 | 4115 | 4115 | 4112 | 4113 | 4115 | Secretaries                                                  |
|                                                              |      |      |      | 4120 |      | 4120 | Numerical clerks                                             |
| Accounting and book-keeping clerks                           | 4121 | 4121 | 4121 |      | 4121 |      |                                                              |
| Statistical and finance clerks                               | 4122 | 4122 | 4122 |      | 4114 |      |                                                              |
|                                                              |      |      |      |      | 4129 |      |                                                              |
| Stock clerks                                                 | 4131 | 4131 | 4131 | 4131 | 4131 | 4130 | Stock and production clerks                                  |
| Production clerks                                            | 4132 | 4132 |      |      | 4132 |      |                                                              |
| Transport clerks                                             | 4133 | 4133 | 4133 | 4132 | 4133 | 4133 | Transport clerks                                             |
| Library and filing clerks                                    | 4141 | 4141 | 4141 | 4140 | 4141 | 4140 | Coding, proof-reading, library and related clerks            |
| Coding, proof-reading and related clerks                     | 4143 | 4143 |      |      |      |      |                                                              |
| Mail carriers and sorting clerks                             | 4142 | 4142 | 4142 | 4150 | 4142 | 4142 | Mail carriers and sorting clerks                             |
| Scribes and related workers                                  | 4144 |      |      |      |      | 4190 | Other office clerks                                          |
| Other office clerks                                          | 4190 | 4190 | 4190 | 4190 |      |      |                                                              |
|                                                              |      |      |      |      | 5225 |      |                                                              |
| Cashiers and ticket clerks                                   | 4211 | 4211 | 4211 | 4211 | 4211 | 4211 | Cashiers and ticket clerks                                   |
| Tellers and other counter clerks                             | 4212 | 4212 | 4212 | 4212 | 4212 | 4212 | Tellers and other counter clerks                             |
| Bookmakers and croupiers                                     | 4213 | 4213 | 4213 | 4213 | 4213 | 4213 | Bookmakers and croupiers                                     |
| Pawnbrokers and money-lenders                                | 4214 | 4214 | 4214 | 4214 | 4214 | 4214 | Pawnbrokers and money-lenders                                |
| Debt-collectors and related workers                          | 4215 | 4215 | 4215 | 4215 | 4215 | 4215 | Debt-collectors and related workers                          |
| Travel agency and related clerks                             | 4221 | 4221 | 4221 | 4221 | 4221 | 4220 | Travel agency and related clerks                             |
|                                                              |      |      |      |      | 4224 |      |                                                              |
| Receptionists and information clerks                         | 4222 | 4222 | 4222 | 4222 | 4222 | 4222 | Receptionists and information clerks                         |
| Telephone switchboard operators                              | 4223 | 4223 | 4223 | 4223 | 4223 | 4223 | Telephone switchboard operators                              |
| Travel attendants and travel stewards                        | 5111 | 5111 | 5111 | 5111 | 5111 | 5111 | Travel attendants and travel stewards                        |
| Transport conductors                                         | 5112 | 5112 | 5112 | 5112 | 5112 | 5112 | Transport conductors                                         |
| Travel guides                                                | 5113 | 5113 | 5113 | 5113 | 5113 | 5113 | Travel guides                                                |
| Housekeepers and related workers                             | 5121 | 5121 | 5121 | 5121 | 5121 | 5121 | Housekeepers and related workers                             |
| Cooks                                                        | 5122 | 5122 | 5122 | 5122 | 5122 | 5122 | Cooks                                                        |



|                                                            |      |      |      |             |             |      |                                                        |
|------------------------------------------------------------|------|------|------|-------------|-------------|------|--------------------------------------------------------|
| Waiters, waitresses and bartenders                         | 5123 | 5123 | 5123 | 5123        | 5123        | 5123 | Waiters, waitresses and bartenders                     |
| Child-care workers                                         | 5131 | 5131 | 5131 | 5131        | 5131        | 5131 | Child-care workers                                     |
|                                                            |      |      |      |             | 5136        |      |                                                        |
| Institution-based personal care workers                    | 5132 | 5132 | 5132 | 5132        | 5132        | 5130 | Institution-based personal care workers                |
|                                                            |      |      |      | 5135        | 5134        |      |                                                        |
|                                                            |      |      |      |             | 5135        |      |                                                        |
| Home-based personal care workers                           | 5133 | 5133 | 5133 | 5133        | 5133        | 5133 | Home-based personal care workers                       |
|                                                            |      |      |      | 5134        |             | 5139 | Unspecified personal care and related workers          |
| Personal care and related workers not elsewhere classified | 5139 | 5139 | 5139 | 5139        | 5139        |      |                                                        |
| Hairdressers, barbers, beauticians and related workers     | 5141 | 5141 | 5141 | 5141        | 5141        | 5140 | Hairdressers, barbers, beauticians and related workers |
|                                                            |      |      |      |             | 7435        |      |                                                        |
| Companions and valets                                      | 5142 | 5142 |      |             |             | 5142 | Companions and valets                                  |
| Undertakers and embalmers                                  | 5143 | 5143 | 5143 | 5142        | 5142        | 5143 | Undertakers and embalmers                              |
|                                                            |      |      |      |             | 5143        | 5149 | Unspecified personal services workers                  |
| Other personal services workers not elsewhere classified   | 5149 | 5149 | 5149 | 5149        | 5149        |      |                                                        |
| Fire-fighters                                              | 5161 | 5161 | 5161 | 5151        | 5161        | 5161 | Fire-fighters                                          |
| Police officers                                            | 5162 | 5162 | 5162 | <b>3450</b> | <b>3450</b> | 5162 | Police officers                                        |
| Prison guards                                              | 5163 | 5163 | 5163 | 5153        | 5162        | 5163 | Prison guards                                          |
| Protective services workers not elsewhere classified       | 5169 | 5169 | 5169 | 5159        | 5169        | 5169 | Unspecified protective services workers                |
|                                                            |      |      |      | <b>5152</b> | <b>5164</b> |      |                                                        |
| Fashion and other models                                   | 5210 | 5210 | 5210 | 5210        | 5210        | 5210 | Fashion and other models                               |
| Shop, stall and market salespersons and demonstrators      | 5220 | 5220 | 5220 |             | 5221        | 5220 | Shop, stall and market salespersons and demonstrators  |
|                                                            |      |      |      |             | 5222        |      |                                                        |
|                                                            |      |      |      |             | 5222        |      |                                                        |
|                                                            |      |      |      |             | 5223        |      |                                                        |
| Stall and market salespersons                              | 5230 |      |      |             | 5224        |      |                                                        |
|                                                            |      |      |      |             | 5225        |      |                                                        |
|                                                            |      |      |      |             | 5226        |      |                                                        |
| Field crop and vegetable growers                           | 6111 | 6111 | 6111 | 6111        | 6111        | 6111 | Field crop and vegetable growers                       |
| Gardeners, horticultural and nursery growers               | 6112 | 6112 | 6112 | 6112        | 6112        | 6112 | Gardeners, horticultural and nursery growers           |
|                                                            |      |      |      | 6113        | 7129        |      |                                                        |
| Dairy and livestock producers                              | 6121 | 6121 | 6121 | 6121        | 6121        | 6121 | Dairy and livestock producers                          |
|                                                            |      |      | 6122 |             |             |      |                                                        |
| Poultry producers                                          | 6122 | 6122 |      | 6122        | 6122        | 6120 |                                                        |

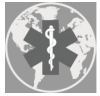

|                                                                    |      |      |      |      |      |      |                                                                                     |
|--------------------------------------------------------------------|------|------|------|------|------|------|-------------------------------------------------------------------------------------|
| Animal producers and related workers not elsewhere classified      | 6129 | 6129 | 6129 | 6129 | 6129 |      | Poultry and unspecified animal producers and related workers                        |
| Crop and animal producers                                          | 6130 | 6130 | 6130 | 6130 | 6130 | 6130 | Crop and animal producers                                                           |
|                                                                    |      |      | 6123 |      |      |      |                                                                                     |
|                                                                    |      |      | 6140 | 6140 | 6210 |      |                                                                                     |
| Forestry workers and loggers                                       | 6141 | 6141 |      |      |      | 6140 | Motorised farm and forestry plant operators and other forestry and related workers, |
| Charcoal burners and related workers                               | 6142 | 6142 |      |      |      |      |                                                                                     |
| Motorised farm and forestry plant operators                        | 8331 | 8331 | 8331 | 8331 |      |      |                                                                                     |
| Aquatic life cultivation workers                                   | 6151 | 6151 | 6151 | 6151 | 6310 | 6151 | Aquatic life cultivation workers                                                    |
| Inland and coastal waters fishery workers                          | 6152 | 6152 | 6152 | 6152 | 6411 | 6152 | Inland and coastal waters fishery workers                                           |
| Deep-sea fishery workers                                           | 6153 | 6153 |      |      |      | 6153 | Deep-sea fishery workers                                                            |
| Hunters and trappers                                               | 6154 | 6154 | 6154 | 6153 | 6412 | 6154 | Hunters and trappers                                                                |
| Miners and quarry workers                                          | 7111 | 7111 | 7111 | 7111 |      |      |                                                                                     |
| Shotfirers and blasters                                            | 7112 | 7112 | 7112 |      | 7127 | 7110 | Mining, mineral-ore and stone-processing-plant operators and related workers        |
| Mining plant operators                                             | 8111 | 8111 | 8111 |      | 8111 |      |                                                                                     |
| Mineral-ore and stone-processing-plant operators                   | 8112 | 8112 | 8112 | 8111 | 8112 |      |                                                                                     |
| Stone splitters, cutters and carvers                               | 7113 | 7113 | 7113 | 7112 | 7110 | 7113 | Stone splitters, cutters and carvers                                                |
| Builders                                                           | 7121 | 7121 | 7121 |      |      | 7121 | Builders, bricklayers and stonemasons                                               |
| Bricklayers and stonemasons                                        | 7122 | 7122 | 7122 | 7121 | 7121 |      |                                                                                     |
| Concrete placers, concrete finishers and related workers           | 7123 | 7123 | 7123 | 7122 | 7122 |      |                                                                                     |
| Plasterers                                                         | 7133 | 7133 | 7133 |      |      | 7120 | Plasterers, concrete placers, concrete finishers and related workers                |
|                                                                    |      |      |      |      | 7123 |      |                                                                                     |
|                                                                    |      |      |      |      | 7124 |      |                                                                                     |
| Carpenters and joiners                                             | 7124 | 7124 | 7124 | 7123 | 7125 |      |                                                                                     |
|                                                                    |      |      |      |      | 7422 | 7129 | Carpenters, joiners and unspecified building frame and related trades workers       |
| Building frame and related trades workers not elsewhere classified | 7129 | 7129 | 7129 | 7129 |      |      |                                                                                     |
| Roofers                                                            | 7131 | 7131 | 7131 | 7131 | 7131 | 7131 | Roofers                                                                             |
| Floor layers and tile setters                                      | 7132 | 7132 | 7132 | 7132 |      | 7132 | Floor layers and tile setters                                                       |
| Insulation workers                                                 | 7134 | 7134 | 7134 | 7133 | 7132 | 7134 | Insulation workers                                                                  |
| Glaziers                                                           | 7135 | 7135 | 7135 | 7134 | 7133 | 7135 | Glaziers                                                                            |
| Plumbers and pipe fitters                                          | 7136 | 7136 | 7136 | 7135 | 7134 | 7136 | Plumbers and pipe fitters                                                           |
| Building and related electricians                                  | 7137 | 7137 | 7137 | 7136 |      | 7130 | Building and related electricians, electrical mechanics fitters and services        |
| Electrical mechanics fitters and services                          | 7241 | 7241 | 7241 | 7241 | 7241 |      |                                                                                     |



|                                                                       |      |      |      |      |      |      |                                                                   |
|-----------------------------------------------------------------------|------|------|------|------|------|------|-------------------------------------------------------------------|
| Building finishers and related trade workers not elsewhere classified | 7139 | 7139 | 7139 | 7139 |      | 7139 | Unspecified building finishers and related trade workers          |
| Painters and related workers                                          | 7141 | 7141 | 7141 | 7141 | 7141 | 7140 | Painters, varnishers and related workers                          |
| Varnishers and Related Painters                                       | 7142 | 7142 |      | 7142 | 7142 |      |                                                                   |
| Building structure cleaners                                           | 7143 | 7143 | 7143 | 7143 |      | 7150 | Building structure cleaners and building caretakers               |
|                                                                       |      |      |      |      | 7143 |      |                                                                   |
|                                                                       |      |      |      |      | 7144 |      |                                                                   |
| Building caretakers                                                   | 9141 | 9141 | 9141 | 7137 |      |      |                                                                   |
| Metal moulders and coremakers                                         | 7211 | 7211 | 7211 | 7211 | 7211 | 7211 | Metal moulders and coremakers                                     |
| Welders and flame cutters                                             | 7212 | 7212 | 7212 | 7212 | 7212 | 7212 | Welders and flame cutters                                         |
| Sheet-metal workers                                                   | 7213 | 7213 | 7213 | 7213 | 7214 | 7210 | Sheet-metal workers                                               |
|                                                                       |      |      |      |      | 7217 |      |                                                                   |
| Structural-metal preparers and erectors                               | 7214 | 7214 | 7214 | 7214 | 7213 | 7214 | Structural-metal preparers and erectors                           |
| Riggers and cable splicers                                            | 7215 | 7215 | 7215 | 7215 | 7215 | 7215 | Riggers and cable splicers                                        |
| Underwater workers                                                    | 7216 | 7216 | 7216 | 7216 | 7216 | 7216 | Underwater workers                                                |
| Blacksmiths, hammer-smiths and forging-press workers                  | 7221 | 7221 | 7221 | 7221 | 7221 | 7220 | Blacksmiths, tool-makers and related trades workers               |
|                                                                       |      |      |      |      | 7222 |      |                                                                   |
| Tool-makers and related workers                                       | 7222 | 7222 | 7222 | 7222 |      |      |                                                                   |
| Machine-tool setters and setter-operators                             | 7223 | 7223 | 7223 | 7223 |      |      |                                                                   |
| Metal wheel-grinders, polishers and tool sharpeners                   | 7224 | 7224 | 7224 | 7224 |      |      |                                                                   |
| Motor vehicle mechanics and fitters                                   | 7231 | 7231 | 7231 | 7231 | 7231 | 7231 | Motor vehicle mechanics and fitters                               |
| Aircraft engine mechanics and fitters                                 | 7232 | 7232 | 7232 | 7232 | 7232 | 7232 | Aircraft engine mechanics and fitters                             |
| Agricultural- or industrial-machinery mechanics and fitters           | 7233 | 7233 | 7233 | 7233 | 7233 | 7230 | Agricultural- or industrial-machinery mechanics and fitters       |
|                                                                       |      |      |      |      | 7234 |      |                                                                   |
|                                                                       |      |      |      |      | 7235 |      |                                                                   |
|                                                                       |      |      |      |      | 7236 |      |                                                                   |
|                                                                       |      |      |      |      | 7237 |      |                                                                   |
| Electronics mechanics, fitters and servicers                          | 7242 | 7242 | 7242 | 7242 | 7243 | 7240 | Electronics mechanics, fitters and servicers                      |
|                                                                       |      | 7243 |      |      |      |      |                                                                   |
| Telegraph and telephone installers and servicers                      | 7244 | 7244 | 7244 |      | 7242 | 7250 | Telegraph, telephone and electrical line installers and servicers |
| Electrical line installers, repairers and cable jointers              | 7245 | 7245 | 7245 | 7243 | 7244 |      |                                                                   |
| Precision-instrument makers and repairers                             | 7311 | 7311 | 7311 | 7311 | 7311 | 7311 | Precision-instrument makers and repairers                         |
| Musical-instrument makers and tuners                                  | 7312 | 7312 | 7312 | 7312 | 7312 | 7312 | Musical-instrument makers and tuners                              |
| Jewellery and precious-metal workers                                  | 7313 | 7313 | 7313 | 7313 | 7313 | 7313 | Jewellery and precious-metal workers                              |
| Abrasive wheel formers, potters and related workers                   | 7321 | 7321 | 7321 | 7321 | 7321 | 7321 | Abrasive wheel formers, potters and related workers               |



|                                                              |      |      |      |      |      |      |                                                                                |
|--------------------------------------------------------------|------|------|------|------|------|------|--------------------------------------------------------------------------------|
| Glass-makers, cutters, grinders and finishers                | 7322 | 7322 | 7322 | 7322 | 7322 | 7320 | Glass and ceramics handicraft workers                                          |
| Glass engravers and etchers                                  | 7323 | 7323 | 7323 | 7323 |      |      |                                                                                |
| Glass, ceramics and related decorative painters              | 7324 | 7324 | 7324 | 7324 | 8131 |      |                                                                                |
|                                                              |      |      | 7330 | 7330 |      | 7330 | Handicraft workers in wood, textile, leather and related materials             |
| Handicraft workers in wood and related materials             | 7331 | 7331 |      |      | 7331 |      |                                                                                |
| Handicraft workers in textile, leather and related materials | 7332 | 7332 |      |      | 7332 |      |                                                                                |
| Compositors, typesetters and related workers                 | 7341 | 7341 | 7341 | 7341 | 7341 | 7341 | Compositors, typesetters and related workers                                   |
|                                                              |      |      |      |      | 7350 |      |                                                                                |
| Stereotypers and electrotypers                               | 7342 | 7342 | 7342 |      |      | 7340 | Electrotypers, printing, photographic and related workers                      |
| Printing engravers and etchers                               | 7343 | 7343 | 7343 | 7342 |      |      |                                                                                |
| Photographic and related workers                             | 7344 | 7344 | 7344 |      | 7342 |      |                                                                                |
| Butchers, fishmongers and related food preparers             | 7411 | 7411 | 7411 | 7411 | 7411 | 7411 | Butchers, fishmongers and related food preparers                               |
| Bakers, pastry-cooks and confectionery makers                | 7412 | 7412 | 7412 | 7412 | 7412 | 7412 | Bakers, pastry-cooks and confectionery makers                                  |
| Food and beverage tasters and graders                        | 7415 | 7415 | 7415 | 7413 | 7413 | 7415 | Food and beverage tasters and graders                                          |
| Wood treaters                                                | 7421 | 7421 | 7421 |      |      | 7420 | Wood treaters, cabinetmakers, woodworking machine setters and setter-operators |
| Cabinetmakers and related workers                            | 7422 | 7422 | 7422 | 7421 | 7421 |      |                                                                                |
| Woodworking machine setters and setter-operators             | 7423 | 7423 | 7423 |      |      |      |                                                                                |
| Basketry weavers, brush makers and related workers           | 7424 | 7424 | 7424 | 7422 | 7423 | 7424 | Basketry weavers, brush makers and related workers                             |
| Tailors, dressmakers and hatters                             | 7433 | 7433 | 7433 | 7431 | 7432 | 7433 | Tailors, dressmakers and hatters                                               |
| Furriers and related workers                                 | 7434 | 7434 | 7434 | 7432 | 7433 | 7434 | Furriers and related workers                                                   |
| Textile, leather and related pattern-makers and cutters      | 7435 | 7435 | 7435 | 7433 | 7434 | 7430 | Textile, leather and related pattern-makers and cutters                        |
|                                                              |      |      |      |      | 7443 |      |                                                                                |
| Sewers, embroiderers and related workers                     | 7436 | 7436 | 7436 | 7434 |      | 7436 | Sewers, embroiderers and related workers                                       |
| Upholsterers and related workers                             | 7437 | 7437 | 7437 | 7435 | 7436 | 7437 | Upholsterers and related workers                                               |
| Pelt dressers, tanners and fellmongers                       | 7441 | 7441 | 7441 | 7441 | 7441 | 7440 | Pelt dressers, tanners and fellmongers                                         |
| Shoe-makers and related workers                              | 7442 | 7442 | 7442 | 7442 | 7442 |      |                                                                                |
|                                                              |      |      |      |      | 8113 | 8113 | Well drillers and borers, and related workers                                  |
| Well drillers and borers and related workers                 | 8113 | 8113 | 8113 | 8112 | 8114 |      |                                                                                |
| Ore and metal furnace operators                              | 8121 | 8121 | 8121 | 8121 | 8121 | 8120 | Metal-processing-plant operators                                               |
| Metal melters, casters and rolling-mill operators            | 8122 | 8122 | 8122 | 8122 | 8122 |      |                                                                                |
|                                                              |      |      |      |      | 8125 |      |                                                                                |
| Metal heat-treating-plant operators                          | 8123 | 8123 | 8123 | 8123 |      |      |                                                                                |
| Metal drawers and extruders                                  | 8124 | 8124 | 8124 | 8124 |      | 8130 |                                                                                |
|                                                              |      |      |      | 8130 |      |      |                                                                                |

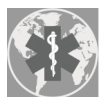

|                                                                         |      |      |      |      |      |                                                                |                                                          |
|-------------------------------------------------------------------------|------|------|------|------|------|----------------------------------------------------------------|----------------------------------------------------------|
| Glass and ceramics kiln and related machine operators                   | 8131 | 8131 | 8131 | 8132 |      | Glass, ceramics, paper and related machine and plant operators |                                                          |
| Glass, ceramics and related plant operators not elsewhere classified    | 8139 | 8139 | 8139 | 8139 |      |                                                                |                                                          |
| Paper-pulp plant operators                                              | 8142 | 8142 | 8142 | 8143 |      |                                                                | 8142                                                     |
| Papermaking-plant operators                                             | 8143 | 8143 | 8143 | 8144 |      |                                                                |                                                          |
|                                                                         |      |      | 8150 | 8150 | 8150 | Chemical-processing-plant operators                            |                                                          |
| Crushing-, grinding- and chemical-mixing-machinery operators            | 8151 | 8151 |      |      |      |                                                                |                                                          |
| Chemical-heat-treating-plant operators                                  | 8152 | 8152 |      |      |      |                                                                |                                                          |
| Chemical-filtering- and separating-equipment operators                  | 8153 | 8153 |      |      |      |                                                                |                                                          |
| Chemical-still and reactor operators (except petroleum and natural gas) | 8154 | 8154 |      |      |      |                                                                |                                                          |
| Petroleum- and natural-gas-refining-plant operators                     | 8155 | 8155 |      | 8151 |      |                                                                |                                                          |
| Chemical-processing-plant operators not elsewhere classified            | 8159 | 8159 |      | 8159 |      |                                                                |                                                          |
|                                                                         |      |      | 8160 |      | 8160 | Power-production and related plant operators                   |                                                          |
| Power-production plant operators                                        | 8161 | 8161 | 8161 | 8161 |      |                                                                |                                                          |
| Steam-engine and boiler operators                                       | 8162 | 8162 | 8162 |      |      |                                                                |                                                          |
| Incinerator, water-treatment and related plant operators                | 8163 | 8163 | 8163 | 8162 |      |                                                                |                                                          |
| Industrial robot operators                                              | 8170 | 8170 | 8170 | 8170 | 8170 | Industrial robot operators                                     |                                                          |
| Machine-tool operators                                                  | 8211 | 8211 | 8211 | 8211 | 8212 | 8210                                                           | Machine-tool operators                                   |
|                                                                         |      |      |      | 8213 |      |                                                                |                                                          |
| Cement and other mineral products machine operators                     | 8212 | 8212 | 8212 | 8212 | 8214 | 8212                                                           | Cement and other mineral products machine operators      |
| Pharmaceutical-and toiletry-products machine operators                  | 8221 | 8221 | 8221 | 8221 | 8221 | 8221                                                           | Pharmaceutical-and toiletry-products machine operators   |
| Ammunition- and explosive-products machine operators                    | 8222 | 8222 | 8222 | 8222 | 8222 | 8222                                                           | Ammunition- and explosive-products machine operators     |
| Metal finishing-, plating- and coating-machine operators                | 8223 | 8223 | 8223 | 8223 | 8225 | 8223                                                           | Metal finishing-, plating- and coating-machine operators |
| Photographic-products machine operators                                 | 8224 | 8224 | 8224 | 8224 | 8254 | 8224                                                           | Photographic-products machine operators                  |
| Chemical-products machine operators not elsewhere classified            | 8229 | 8229 | 8229 | 8229 | 8229 | 8229                                                           | Unspecified chemical-products machine operators          |
| Rubber-products machine operators                                       | 8231 | 8231 | 8231 | 8231 | 8223 | 8231                                                           | Rubber-products machine operators                        |
| Plastic-products machine operators                                      | 8232 | 8232 | 8232 | 8232 | 8224 | 8232                                                           | Plastic-products machine operators                       |



|                                                                                |      |      |      |      |           |      |                                                                               |
|--------------------------------------------------------------------------------|------|------|------|------|-----------|------|-------------------------------------------------------------------------------|
| Wood-products machine operators                                                | 8240 | 8240 | 8240 | 8240 |           |      |                                                                               |
| Wood-processing-plant operators                                                | 8141 | 8141 | 8141 | 8141 | 8141      | 8240 | Wood-products machine operators                                               |
|                                                                                |      |      |      |      | 8142 8143 |      |                                                                               |
| Printing-machine operators                                                     | 8251 | 8251 | 8251 | 8251 | 8251      | 8250 | Printing-machine operators and craft textile printers                         |
| Silk-screen, block and craft textile printers                                  | 7346 | 7346 | 7346 | 7344 |           |      |                                                                               |
| Book-binding-machine operators                                                 | 8252 | 8252 | 8252 | 8252 | 8252      | 8259 | Book-binding-machine operators and related workers                            |
| Bookbinders and related workers                                                | 7345 | 7345 | 7345 | 7343 |           |      |                                                                               |
| Paper-products machine operators                                               | 8253 | 8253 | 8253 | 8253 | 8253      | 8253 | Paper-products machine operators                                              |
| Fibre-preparing-, spinning- and winding-machine operators                      | 8261 | 8261 | 8261 | 8261 | 8261      | 8261 | Fibre-preparing-, spinning- and winding-machine operators and related workers |
| Fibre preparers                                                                | 7431 | 7431 | 7431 |      |           |      |                                                                               |
| Weaving- and knitting-machine operators                                        | 8262 | 8262 | 8262 | 8262 | 8262      | 8262 | Weaving- and knitting-machine operators and related workers                   |
| Weavers, knitters and related workers                                          | 7432 | 7432 | 7432 |      | 7431      |      |                                                                               |
| Sewing-machine operators                                                       | 8263 | 8263 | 8263 | 8263 | 8263      | 8263 | Sewing-machine operators                                                      |
| Bleaching-, dyeing- and cleaning-machine operators                             | 8264 | 8264 | 8264 | 8264 | 8266      | 8264 | Bleaching-, dyeing- and cleaning-machine operators                            |
| Shoemaking- and related machine operators                                      | 8266 | 8266 | 8266 | 8265 | 8267      | 8266 | Shoemaking- and related machine operators                                     |
| Fur- and leather-preparing-machine operators                                   | 8265 | 8265 | 8265 |      |           |      |                                                                               |
| Textile-, fur- and leather-products machine operators not elsewhere classified | 8269 | 8269 | 8269 | 8269 | 8269      | 8269 | Textile, fur- and leather-preparing-and product machine operators             |
|                                                                                |      |      |      |      | 8264      |      |                                                                               |
|                                                                                |      |      |      |      | 8265      |      |                                                                               |
| Meat- and fish-processing-machine operators                                    | 8271 | 8271 | 8271 | 8271 |           | 8271 | Meat- and fish-processing-machine operators                                   |
|                                                                                |      |      |      |      |           | 8271 |                                                                               |
|                                                                                |      |      |      |      |           | 8272 |                                                                               |
| Dairy-products machine operators                                               | 8272 | 8272 | 8272 | 8272 | 8273      | 8272 | Dairy-products machine operators and workers                                  |
| Dairy-products workers                                                         | 7413 | 7413 | 7413 |      |           |      |                                                                               |
| Grain- and spice-milling-machine operators                                     | 8273 | 8273 | 8273 | 8273 | 8274      | 8273 | Grain- and spice-milling-machine operators                                    |
| Baked-goods, cereal- and chocolate-products machine operators                  | 8274 | 8274 | 8274 | 8274 | 8275      | 8274 | Baked-goods, cereal- and chocolate-products machine operators                 |
| Fruit-, vegetable- and nut-processing-machine operators                        | 8275 | 8275 | 8275 | 8275 | 8276      | 8275 | Fruit-, vegetable- and nut-processing-machine operators and workers           |
| Fruit, vegetable and related preservers                                        | 7414 | 7414 | 7414 |      |           |      |                                                                               |
| Brewers, wine and other beverage machine operators                             | 8278 | 8278 | 8278 | 8278 | 8277      | 8278 | Brewers, wine and other beverage machine operators                            |
| Sugar production machine operators                                             | 8276 | 8276 | 8276 | 8276 |           |      |                                                                               |
| Tea-, coffee- and cocoa-processing-machine operators                           | 8277 | 8277 | 8277 | 8277 |           | 8270 | Sugar, tee, coffee and tobacco production machine operators                   |
| Tobacco production machine operators                                           | 8279 | 8279 | 8279 | 8279 |           |      |                                                                               |

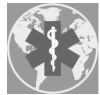

|                                                                  |      |      |      |      |      |      |                                                          |
|------------------------------------------------------------------|------|------|------|------|------|------|----------------------------------------------------------|
| Tobacco preparers and tobacco products makers                    | 7416 | 7416 | 7416 |      |      |      |                                                          |
|                                                                  |      |      |      | 8279 |      |      |                                                          |
|                                                                  |      |      |      | 7419 |      |      |                                                          |
| Mechanical-machinery assemblers                                  | 8281 | 8281 | 8281 | 8281 | 8281 |      |                                                          |
| Electrical-equipment assemblers                                  | 8282 | 8282 | 8282 | 8282 |      |      |                                                          |
| Electronic-equipment assemblers                                  | 8283 | 8283 | 8283 |      | 8282 |      |                                                          |
| Metal-, rubber- and plastic-products assemblers                  | 8284 | 8284 | 8284 | 8283 | 8211 | 8280 | Assemblers                                               |
| Wood and related products assemblers                             | 8285 | 8285 | 8285 | 8284 |      |      |                                                          |
| Paperboard, textile and related products assemblers              | 8286 | 8286 | 8286 | 8225 |      |      |                                                          |
| Composite products assemblers                                    | 8287 | 8287 |      |      |      |      |                                                          |
| Other machine operators not elsewhere classified                 | 8290 | 8290 | 8290 | 8290 |      | 8290 | Unspecified machine operators                            |
| Locomotive engine drivers                                        | 8311 | 8311 | 8311 | 8311 | 8311 | 8311 | Locomotive engine drivers                                |
| Railway brakemen, signallers and shunters                        | 8312 | 8312 | 8312 | 8312 | 8312 | 8312 | Railway brakemen, signallers and shunters                |
| Motorcycle drivers                                               | 8321 | 8321 | 8321 |      |      |      |                                                          |
| Car, taxi and van drivers                                        | 8322 | 8322 | 8322 | 8321 | 8321 | 8320 | Car, taxi, van and motorcycle drivers                    |
| Bus and tram drivers                                             | 8323 | 8323 | 8323 | 8322 | 8322 | 8323 | Bus and tram drivers                                     |
| Heavy truck and lorry drivers                                    | 8324 | 8324 | 8324 | 8323 | 8323 | 8324 | Heavy truck and lorry drivers                            |
| Earth-moving and related plant operators                         | 8332 | 8332 | 8332 | 8332 | 8331 | 8332 | Earth-moving and related plant operators                 |
| Crane, hoist and related plant operators                         | 8333 | 8333 | 8333 | 8333 | 8332 | 8333 | Crane, hoist and related plant operators                 |
| Lifting-truck operators                                          | 8334 | 8334 | 8334 | 8334 | 8333 | 8334 | Lifting-truck operators                                  |
| Ships' deck crews and related workers                            | 8340 | 8340 | 8340 | 8340 |      |      |                                                          |
|                                                                  |      |      |      | 8341 |      | 8340 | Ships' deck crews and related workers                    |
|                                                                  |      |      |      | 8342 |      |      |                                                          |
| Street vendors                                                   | 9111 |      | 9111 | 9110 |      |      |                                                          |
| Door-to-door and telephone salespersons                          | 9113 | 9113 | 9113 | 5227 | 5223 | 9110 | Street vendors and street service elementary occupations |
| Shoe cleaning and other street services elementary occupations   | 9120 | 9120 | 9120 |      | 9120 |      |                                                          |
|                                                                  |      |      |      | 9130 |      |      |                                                          |
| Domestic helpers and cleaners                                    | 9131 | 9131 | 9131 | 9121 | 9131 |      |                                                          |
| Helpers and cleaners in offices, hotels and other establishments | 9132 | 9132 | 9132 | 9122 | 9132 | 9130 | Domestic and related helpers, cleaners and launderers    |
| Hand-launderers and pressers                                     | 9133 | 9133 | 9133 |      |      |      |                                                          |
|                                                                  |      |      |      | 9133 |      |      |                                                          |
| Vehicle, window and related cleaners                             | 9142 | 9142 | 9142 | 9123 | 9141 | 9140 | Vehicle, window and related cleaners                     |



|                                                                               |      |      |      |      |      |      |                                                                     |
|-------------------------------------------------------------------------------|------|------|------|------|------|------|---------------------------------------------------------------------|
|                                                                               |      |      |      |      | 9142 |      |                                                                     |
|                                                                               |      |      |      |      | 5163 |      |                                                                     |
|                                                                               |      |      |      | 9190 |      |      |                                                                     |
| Messengers, package and luggage porters and deliverers                        | 9151 | 9151 | 9151 | 9141 | 9151 | 9151 | Messengers, package and luggage porters and deliverers              |
| Doorkeepers, watchpersons and related workers                                 | 9152 | 9152 | 9152 | 9142 | 9152 | 9152 | Doorkeepers, watchpersons and related workers                       |
| Vending-machine money collectors, meter readers and related workers           | 9153 | 9153 | 9153 | 9143 | 9153 | 9153 | Vending-machine money collectors, meter readers and related workers |
|                                                                               |      |      |      |      | 9160 |      |                                                                     |
| Garbage collectors                                                            | 9161 | 9161 | 9161 | 9150 |      | 9160 | Garbage collectors and related labourers                            |
| Sweepers and related labourers                                                | 9162 | 9162 | 9162 |      |      |      |                                                                     |
|                                                                               |      |      |      | 9210 | 9210 | 9210 |                                                                     |
| Farm-hands and labourers                                                      | 9211 | 9211 |      |      |      | 9210 | Agricultural, fishery and related labourers                         |
| Forestry labourers                                                            | 9212 | 9212 |      |      |      |      |                                                                     |
| Fishery, hunting and trapping labourers                                       | 9213 | 9213 |      |      |      |      |                                                                     |
|                                                                               |      |      |      | 9310 | 9310 |      |                                                                     |
| Mining and quarrying labourers                                                | 9311 | 9311 | 9311 |      |      | 9310 | Mining and construction labourers                                   |
| Construction and maintenance labourers: roads, dams and similar constructions | 9312 | 9312 | 9312 |      |      |      |                                                                     |
| Building construction labourers                                               | 9313 | 9313 | 9313 |      |      |      |                                                                     |
|                                                                               |      |      |      | 7124 | 7126 |      |                                                                     |
|                                                                               |      |      |      |      | 7128 |      |                                                                     |
| Manufacturing labourers                                                       | 9320 | 9320 | 9320 | 9320 | 9320 | 9320 | Manufacturing labourers                                             |
| Transport labourers and freight handlers                                      | 9330 | 9330 | 9330 | 9330 | 9330 | 9330 | Transport labourers and freight handlers                            |

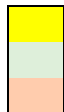

No matching occupation could be found in the national classification

Nordic code is not applicable for at least one national classification

The same Nordic code was assigned to several occupational groups from the national classifications



**Table S2.** Aggregated occupational groups.

| Merged Group Code | Suggested Name                                                                                | Name in the Nordic Crosswalk                                                                   | Nordic Code |
|-------------------|-----------------------------------------------------------------------------------------------|------------------------------------------------------------------------------------------------|-------------|
| 0001              | Managers in computing services, research and development                                      | Computing services managers                                                                    | 1236        |
|                   |                                                                                               | Research and development managers                                                              | 1237        |
| 0002              | Managers of wholesale and retail trade and restaurants and hotels                             | Managers of small enterprises in wholesale and retail trade; restaurants and hotels            | 1310        |
|                   |                                                                                               | Production and operations managers in wholesale and retail trade, and restaurants and hotels   | 1224        |
| 0003              | Managers of small enterprises in agriculture, hunting, forestry and fishing, and growers      | Managers of small enterprises in agriculture, hunting, forestry and fishing                    | 1311        |
|                   |                                                                                               | Field crop and vegetable growers                                                               | 6111        |
|                   |                                                                                               | Gardeners, horticultural and nursery growers                                                   | 6112        |
|                   |                                                                                               | Aquatic life cultivation workers                                                               | 6151        |
|                   |                                                                                               | Inland and coastal waters fishery workers                                                      | 6152        |
|                   |                                                                                               | Hunters and trappers                                                                           | 6154        |
| 0004              | Managers in manufacturing                                                                     | Managers of small enterprises in manufacturing                                                 | 1312        |
|                   |                                                                                               | Production and operations managers in manufacturing                                            | 1222        |
| 0005              | Managers in construction                                                                      | Managers of small enterprises in construction                                                  | 1313        |
|                   |                                                                                               | Production and operations managers in construction                                             | 1223        |
| 0006              | Managers in personal care, cleaning and related services                                      | Managers of small enterprises in personal care, cleaning and related services                  | 1318        |
|                   |                                                                                               | Production and operations managers in personal care, cleaning and related services             | 1228        |
| 0007              | Managers in storage and communication; business services enterprises, supply and distribution | Managers of small enterprises in storage and communications; business services enterprises     | 1320        |
|                   |                                                                                               | Production and operations managers in storage and communications business services enterprises | 1220        |
|                   |                                                                                               | Supply and distribution managers                                                               | 1235        |
| 0008              | Managers in unspecified enterprises                                                           | Production and operations managers not elsewhere classified                                    | 1229        |
|                   |                                                                                               | Managers of small enterprises not elsewhere classified                                         | 1319        |
| 0032              | Physicists, astronomers and meteorologists                                                    | Physicists and astronomers                                                                     | 2111        |
|                   |                                                                                               | Meteorologists                                                                                 | 2112        |
| 0033              | Mathematicians, statisticians and related professionals                                       | Mathematicians and related professionals                                                       | 2121        |
|                   |                                                                                               | Statisticians                                                                                  | 2122        |
| 0034              | Lawyers, judges and other legal professionals                                                 | Lawyers                                                                                        | 2421        |
|                   |                                                                                               | Judges                                                                                         | 2422        |
|                   |                                                                                               | Legal professionals not elsewhere classified                                                   | 2429        |
| 0035              | Professionals and associate professionals in social work                                      | Social work professionals                                                                      | 2446        |
|                   |                                                                                               | Social work associate professionals                                                            | 3460        |
| 0036              | Safety and quality inspectors                                                                 | Building and fire inspectors                                                                   | 3151        |
|                   |                                                                                               | Safety, health and quality inspectors                                                          | 3152        |



|      |                                                                                         |                                                                                           |      |
|------|-----------------------------------------------------------------------------------------|-------------------------------------------------------------------------------------------|------|
| 0037 | Agronomy and forestry advisers and technicians                                          | Agronomy and forestry technicians                                                         | 3212 |
|      |                                                                                         | Farming and forestry advisers                                                             | 3213 |
| 0010 | Dieticians and nutritionists; optometrist and opticians                                 | Dieticians and nutritionists                                                              | 3223 |
|      |                                                                                         | Optometrists and opticians                                                                | 3224 |
|      |                                                                                         | Unspecified health associate professionals (except nursing)                               | 3229 |
| 0011 | Nursing and midwifery professionals and associate professionals                         | Nursing and midwifery professionals                                                       | 2230 |
|      |                                                                                         | Nursing and midwifery associate professionals                                             | 3230 |
| 0012 | Education methods specialists and inspectors, and unspecified teaching professionals    | Education methods specialists and inspectors                                              | 2350 |
|      |                                                                                         | Other teaching professionals not elsewhere classified                                     | 2359 |
| 0013 | Personnel and careers professionals; employment agents, labour contractors              | Personnel and careers professionals                                                       | 2412 |
|      |                                                                                         | Employment agents and labour contractors                                                  | 3423 |
| 0014 | Social scientists, philosophers and historians                                          | Sociologists, anthropologists and related professionals                                   | 2442 |
|      |                                                                                         | Philosophers, historians and political scientists                                         | 2443 |
| 0009 | Translators and interpreters; journalists and other writers; radio and other announcers | Philologists, translators and interpreters                                                | 2444 |
|      |                                                                                         | Authors, journalists and other writers                                                    | 2451 |
|      |                                                                                         | Radio, television and other announcers                                                    | 3472 |
| 0015 | Physiotherapists and unspecified health professionals                                   | Health professionals (except nursing) not elsewhere classified                            | 2229 |
|      |                                                                                         | Physiotherapists and related associate professionals                                      | 3226 |
| 0038 | Customs, tax and related government associate professionals                             | Government licensing officials, customs, tax and other government associate professionals | 3440 |
|      |                                                                                         | Customs and border inspectors                                                             | 3441 |
|      |                                                                                         | Government tax and excise officials                                                       | 3442 |
|      |                                                                                         | Government social benefits officials                                                      | 3443 |
| 0016 | Travel consultants and travel agency clerks                                             | Travel consultants and organisers                                                         | 3414 |
|      |                                                                                         | Travel agency and related clerks                                                          | 4220 |
| 0017 | Appraisers, auctioneers and unspecified associate professionals in finance and sales    | Finance and sales associate professionals not elsewhere classified                        | 3410 |
|      |                                                                                         | Appraisers, valuers and auctioneers                                                       | 3417 |
| 0018 | Choreographers, dancers, creative and performing artists                                | Choreographers and dancers                                                                | 2454 |
|      |                                                                                         | Clowns, magicians, acrobats and related associate professionals                           | 3470 |
|      |                                                                                         | Street, night-club and related musicians, singers and dancers                             | 3473 |
| 0019 | Sculptors, painters and commercial designers                                            | Decorators and commercial designers                                                       | 3471 |
|      |                                                                                         | Sculptors, painters and related artists                                                   | 2450 |
| 0039 | Data processors and secretaries                                                         | Word-processor, data-processing and related operators                                     | 4111 |
|      |                                                                                         | Secretaries                                                                               | 4115 |
|      |                                                                                         | Coding, proof-reading and related clerks                                                  | 4140 |
| 0020 | Cashiers, tellers and other counter clerks                                              | Cashiers and ticket clerks                                                                | 4211 |



|      |                                                                                  |                                                                    |      |
|------|----------------------------------------------------------------------------------|--------------------------------------------------------------------|------|
|      |                                                                                  | Tellers and other counter clerks                                   | 4212 |
|      |                                                                                  | Bookmakers and croupiers                                           | 4213 |
|      |                                                                                  | Pawnbrokers and money-lenders                                      | 4214 |
|      |                                                                                  | Debt-collectors and related workers                                | 4215 |
| 0021 | Travel attendants and guides                                                     | Travel attendants and travel stewards                              | 5111 |
|      |                                                                                  | Travel guides                                                      | 5113 |
| 0040 | Unspecified personal services workers                                            | Undertakers and embalmers                                          | 5143 |
|      |                                                                                  | Other personal services workers not elsewhere classified           | 5149 |
| 0022 | Animal producers                                                                 | Poultry and animal producers                                       | 6120 |
|      |                                                                                  | Dairy and livestock producers                                      | 6121 |
| 0023 | Miners, shotfirers, stone cutters, and related plant operators                   | Miners, shotfirers and mining-, mineral and stone plant operators  | 7110 |
|      |                                                                                  | Stone splitters, cutters and carvers                               | 7113 |
| 0024 | Precision and musical instrument makers, jewellery, glass and handicraft workers | Precision-instrument makers and repairers                          | 7311 |
|      |                                                                                  | Musical-instrument makers and tuners                               | 7312 |
|      |                                                                                  | Jewellery and precious-metal workers                               | 7313 |
|      |                                                                                  | Glass-makers and related trades workers                            | 7320 |
|      |                                                                                  | Handicraft workers in wood, textile, leather and related materials | 7330 |
|      |                                                                                  | Abrasive wheel formers, potters and related workers                | 7321 |
| 0025 | Tailors, sewers and other textile workers                                        | Tailors, dressmakers and hatters                                   | 7433 |
|      |                                                                                  | Sewers, embroiderers and related workers                           | 7436 |
|      |                                                                                  | Upholsterers and related workers                                   | 7437 |
|      |                                                                                  | Textile, leather and related pattern-makers and cutters            | 7430 |
|      |                                                                                  | Furriers and related workers                                       | 7434 |
| 0026 | Metal- and mineral-products machine operators                                    | Metal machine-tool operators                                       | 8210 |
|      |                                                                                  | Cement and other mineral products machine operators                | 8212 |
| 0027 | Chemical-products machine operators                                              | Pharmaceutical-and toiletry-products machine operators             | 8221 |
|      |                                                                                  | Ammunition- and explosive-products machine operators               | 8222 |
|      |                                                                                  | Metal finishing-, plating- and coating-machine operators           | 8223 |
|      |                                                                                  | Chemical-products machine operators not elsewhere classified       | 8229 |
| 0028 | Rubber- and plastic-products machine operators                                   | Rubber-products machine operators                                  | 8231 |
|      |                                                                                  | Plastic-products machine operators                                 | 8232 |
| 0029 | Book- and paper- products machine operators                                      | Paper-products machine operators                                   | 8253 |
|      |                                                                                  | Book-binding-machine operators and related workers                 | 8259 |
| 0041 |                                                                                  | Printing engravers, photographic and related workers               | 7340 |



|      |                                                                                                  |                                                                        |      |
|------|--------------------------------------------------------------------------------------------------|------------------------------------------------------------------------|------|
|      | Photographic and printing workers and machine operators                                          | Textile printers and related machine operators                         | 8250 |
|      |                                                                                                  | Photographic-products machine operators                                | 8224 |
| 0030 | Agricultural or industrial machinery fitters, and mechanical and electrical equipment assemblers | Agricultural- or industrial-machinery mechanics and fitters            | 7230 |
|      |                                                                                                  | Motor vehicle mechanics and fitters                                    | 7231 |
|      |                                                                                                  | Aircraft engine mechanics and fitters                                  | 7232 |
|      |                                                                                                  | Mechanical-machinery and electrical-equipment assemblers               | 8280 |
|      |                                                                                                  | Other machine operators not elsewhere classified                       | 8290 |
| 0042 | Bakers and confectionery makers and food and beverage tasters                                    | Bakers, pastry-cooks and confectionery makers                          | 7412 |
|      |                                                                                                  | Food and beverage tasters and graders                                  | 7415 |
| 0043 | Machine operators of textile, fur and leather                                                    | Fibre preparing-, spinning- and winding-machine operators              | 8261 |
|      |                                                                                                  | Weaving- and knitting-machine operators                                | 8262 |
|      |                                                                                                  | Sewing-machine operators                                               | 8263 |
|      |                                                                                                  | Bleaching-, dyeing- and cleaning-machine operators                     | 8264 |
|      |                                                                                                  | Shoemaking- and related machine operators                              | 8266 |
|      |                                                                                                  | Textile-, Fur- and leather--machine operators                          | 8269 |
| 0044 | Grocery and beverage machine operators                                                           | Sugar, tea-, coffee and tobacco production machine operators           | 8270 |
|      |                                                                                                  | Grain- and spice-milling-machine operators                             | 8273 |
|      |                                                                                                  | Baked-goods, cereal- and chocolate-products machine operators          | 8274 |
|      |                                                                                                  | Fruit-, vegetable- and nut-processing-machine operators and preservers | 8275 |
|      |                                                                                                  | Brewers, wine and other beverage machine operators                     | 8278 |
| 0031 | Watchpersons, meter readers and related workers                                                  | Doorkeepers, watchpersons and related workers                          | 9152 |
|      |                                                                                                  | Vending-machine money collectors, meter readers and related workers    | 9153 |

Legends for Tables S3–S5.

|                                                                                                     | DK | FI | NO | SE |
|-----------------------------------------------------------------------------------------------------|----|----|----|----|
| Incidence of SA does not statistically significantly differ from 0 (95% CI includes 0)              |    |    |    |    |
| Incidence of SA statistically significantly differs from 0, but it is lower than population average |    |    |    |    |
| Incidence of SA statistically significantly higher than population average                          |    |    |    |    |
| Occupational group was excluded due to small size (< 100 persons per occupation)                    | -  | -  | -  | -  |

DK- Denmark; FI- Finland; NO- Norway; SE-Sweden;

Major occupation: 1 – Legislators, senior officials and managers; 2- Professionals; 3-Associate professionals; 4- Clerks; 5- Service and care workers, and shop and market sales workers; 6- Skilled agricultural and fishery workers; 7- Craft and related trades workers; 8- Plant and machine operators and assemblers; 9- Elementary occupations.

**Table S3.** Heatmap of occupational differences in the age-adjusted one-year cumulative incidence of prolonged all-cause SA across four Nordic countries among men and women.

| Code | Major Occupation | Title                                                                                         | Men |    |    |    | Women |    |    |    |
|------|------------------|-----------------------------------------------------------------------------------------------|-----|----|----|----|-------|----|----|----|
|      |                  |                                                                                               | DK  | FI | NO | SE | DK    | FI | NO | SE |
| 0001 | 1                | Managers in computing services, research and development                                      |     |    |    |    |       |    |    |    |
| 0002 | 1                | Managers of wholesale and retail trade and restaurants and hotels                             |     |    |    |    |       |    |    |    |
| 0004 | 1                | Managers in manufacturing                                                                     |     |    |    |    |       |    |    |    |
| 0005 | 1                | Managers in construction                                                                      |     |    |    |    |       |    |    |    |
| 0006 | 1                | Managers in personal care, cleaning and related services                                      |     | -  |    |    |       | -  |    |    |
| 0007 | 1                | Managers in storage and communication; business services enterprises, supply and distribution |     |    |    |    |       |    |    |    |
| 0008 | 1                | Managers in unspecified enterprises                                                           |     |    |    |    |       |    |    |    |
| 1110 | 1                | Legislators and senior government officials                                                   |     |    |    |    |       |    |    |    |
| 1120 | 1                | Senior officials of special-interest organizations                                            |     |    |    |    |       |    |    |    |
| 1210 | 1                | Directors and chief executives                                                                |     |    |    |    |       |    |    |    |
| 1221 | 1                | Production and operations managers in agriculture, hunting, forestry and fishing              |     |    |    |    | -     | -  |    | -  |
| 1231 | 1                | Finance and administration managers                                                           |     |    |    |    |       |    |    |    |
| 1232 | 1                | Personnel and industrial relations managers                                                   |     |    |    |    |       |    |    |    |
| 1233 | 1                | Sales and marketing managers                                                                  |     |    |    |    |       |    |    |    |

|      |   |                                                                                         |  |  |  |  |  |  |  |
|------|---|-----------------------------------------------------------------------------------------|--|--|--|--|--|--|--|
| 1234 | 1 | Advertising and public relations managers                                               |  |  |  |  |  |  |  |
| 1239 | 1 | Other unspecified specialist managers                                                   |  |  |  |  |  |  |  |
| 0009 | 2 | Translators and interpreters; journalists and other writers; radio and other announcers |  |  |  |  |  |  |  |
| 0011 | 2 | Nursing and midwifery professionals and associate professionals                         |  |  |  |  |  |  |  |
| 0012 | 2 | Education methods specialists and inspectors, and unspecified teaching professionals    |  |  |  |  |  |  |  |
| 0014 | 2 | Social scientists, philosophers and historians                                          |  |  |  |  |  |  |  |
| 0015 | 2 | Physiotherapists and unspecified health professionals                                   |  |  |  |  |  |  |  |
| 0019 | 2 | Sculptors, painters and commercial designers                                            |  |  |  |  |  |  |  |
| 0032 | 2 | Physicists, astronomers and meteorologists                                              |  |  |  |  |  |  |  |
| 0033 | 2 | Mathematicians, statisticians and related professionals                                 |  |  |  |  |  |  |  |
| 0034 | 2 | Lawyers, judges and other legal professionals                                           |  |  |  |  |  |  |  |
| 0037 | 2 | Agronomy and forestry advisers and technicians                                          |  |  |  |  |  |  |  |
| 2113 | 2 | Chemists                                                                                |  |  |  |  |  |  |  |
| 2114 | 2 | Geologists and geophysicists                                                            |  |  |  |  |  |  |  |
| 2130 | 2 | Computing professionals                                                                 |  |  |  |  |  |  |  |
| 2141 | 2 | Architects, town and traffic planners                                                   |  |  |  |  |  |  |  |
| 2142 | 2 | Civil engineers                                                                         |  |  |  |  |  |  |  |
| 2143 | 2 | Electrical engineers                                                                    |  |  |  |  |  |  |  |
| 2144 | 2 | Electronics and telecommunications engineers                                            |  |  |  |  |  |  |  |
| 2145 | 2 | Mechanical engineers                                                                    |  |  |  |  |  |  |  |
| 2146 | 2 | Chemical engineers                                                                      |  |  |  |  |  |  |  |
| 2147 | 2 | Mining engineers, metallurgists and related professionals                               |  |  |  |  |  |  |  |
| 2148 | 2 | Cartographers and surveyors                                                             |  |  |  |  |  |  |  |
| 2149 | 2 | Architects, engineers and unspecified related professionals                             |  |  |  |  |  |  |  |
| 2210 | 2 | Agronomists, forestry professionals and related professionals                           |  |  |  |  |  |  |  |
| 2211 | 2 | Biologists, botanists, zoologists and related professionals                             |  |  |  |  |  |  |  |
| 2212 | 2 | Pharmacologists, pathologists and related professionals                                 |  |  |  |  |  |  |  |
| 2221 | 2 | Medical doctors                                                                         |  |  |  |  |  |  |  |
| 2222 | 2 | Dentists                                                                                |  |  |  |  |  |  |  |
| 2223 | 2 | Veterinarians                                                                           |  |  |  |  |  |  |  |
| 2310 | 2 | College, university and higher education teaching professionals                         |  |  |  |  |  |  |  |
| 2320 | 2 | Secondary education teaching professionals                                              |  |  |  |  |  |  |  |
| 2330 | 2 | Primary education teaching professionals and associate professionals                    |  |  |  |  |  |  |  |
| 2340 | 2 | Special education teaching professionals                                                |  |  |  |  |  |  |  |
| 2410 | 2 | Market research, organizational analysts and unspecified business professionals         |  |  |  |  |  |  |  |

|      |   |                                                                                                  |   |   |   |   |   |   |   |
|------|---|--------------------------------------------------------------------------------------------------|---|---|---|---|---|---|---|
| 2411 | 2 | Accountants                                                                                      |   |   |   |   |   |   |   |
| 2431 | 2 | Archivists and curators                                                                          |   |   |   |   |   |   |   |
| 2432 | 2 | Librarians and related information professionals                                                 |   |   |   |   |   |   |   |
| 2441 | 2 | Economists                                                                                       |   |   |   |   |   |   |   |
| 2445 | 2 | Journalists and other writers; radio and other announcers                                        |   |   |   |   |   |   |   |
| 2453 | 2 | Composers, musicians and singers                                                                 |   | - |   |   |   |   |   |
| 2455 | 2 | Film, stage and related actors and directors                                                     |   |   |   |   |   |   |   |
| 2460 | 2 | Religious professionals                                                                          |   |   |   |   |   |   |   |
| 2470 | 2 | Public service administrative professionals                                                      |   |   |   |   |   |   |   |
| 0010 | 3 | Dietician, nutritionists, optometrists, opticians and unspecified health associate professionals |   |   |   |   |   |   |   |
| 0013 | 3 | Personnel and careers professionals; employment agents, labour contractors                       |   |   |   |   |   |   |   |
| 0017 | 3 | Appraisers, auctioneers and unspecified associate professionals in finance and sales             |   |   |   |   |   |   |   |
| 0018 | 3 | Choreographers, dancers, creative and performing artists                                         |   |   |   |   |   |   |   |
| 0035 | 3 | Professionals and associate professionals in social work                                         |   |   |   |   |   |   |   |
| 0038 | 3 | Customs, tax and related government associate professionals                                      |   |   |   |   |   |   |   |
| 3110 | 3 | Chemical and physical science and engineering technicians                                        |   |   |   |   |   |   |   |
| 3112 | 3 | Civil engineering technicians                                                                    |   |   |   |   |   |   |   |
| 3113 | 3 | Electrical engineering technicians                                                               |   |   |   |   |   |   |   |
| 3114 | 3 | Electronics and telecommunications engineering technicians                                       |   |   |   |   |   |   |   |
| 3115 | 3 | Mechanical engineering technicians                                                               |   |   |   |   |   |   |   |
| 3117 | 3 | Mining and metallurgical technicians                                                             |   |   |   |   | - |   |   |
| 3119 | 3 | Unspecified physical and engineering science technicians                                         |   |   |   |   |   |   |   |
| 3120 | 3 | Computer assistants, computer equipment operators and related associate professionals            |   |   |   |   |   |   |   |
| 3130 | 3 | Photographers and image and sound recording equipment operators                                  |   |   |   |   |   |   |   |
| 3132 | 3 | Broadcasting and telecommunications equipment operators                                          |   |   |   |   |   | - |   |
| 3139 | 3 | Unspecified optical, medical and electronic equipment operators                                  |   |   | - |   |   | - |   |
| 3140 | 3 | Air traffic controllers and safety technicians                                                   |   |   |   |   | - |   |   |
| 3141 | 3 | Ships' engineers                                                                                 |   |   |   |   | - | - | - |
| 3142 | 3 | Ships' deck officers and pilots                                                                  |   |   |   |   | - | - | - |
| 3143 | 3 | Aircraft pilots and related associate professionals                                              |   |   |   |   | - | - | - |
| 3210 | 3 | Life science technicians                                                                         |   |   |   |   | - |   |   |
| 3220 | 3 | Medical assistants, hygienists, health and environmental officers                                |   |   |   |   |   |   |   |
| 3225 | 3 | Dental assistants                                                                                | - | - | - | - |   |   |   |
| 3227 | 3 | Veterinary assistants                                                                            | - | - | - |   |   |   |   |
| 3228 | 3 | Pharmaceutical assistants                                                                        |   |   |   |   |   |   |   |

|      |   |                                                                                                   |   |   |   |   |   |   |   |   |
|------|---|---------------------------------------------------------------------------------------------------|---|---|---|---|---|---|---|---|
| 3320 | 3 | Pre-primary education teaching professionals and associate professionals                          |   |   |   |   | - |   |   |   |
| 3340 | 3 | Teaching associate professionals                                                                  |   |   |   |   | - |   |   |   |
| 3411 | 3 | Securities and finance dealers and brokers                                                        |   |   |   |   |   |   |   |   |
| 3412 | 3 | Insurance representatives                                                                         |   | - |   |   |   | - |   |   |
| 3413 | 3 | Estate agents                                                                                     |   |   |   |   |   |   |   |   |
| 3415 | 3 | Technical and commercial sales representatives                                                    |   |   |   |   |   |   |   |   |
| 3416 | 3 | Buyers                                                                                            |   |   |   |   |   |   |   |   |
| 3421 | 3 | Trade brokers                                                                                     |   |   |   |   |   |   | - |   |
| 3422 | 3 | Clearing and forwarding agents                                                                    |   |   |   |   |   |   |   |   |
| 3429 | 3 | Unspecified business services agents and trade brokers                                            |   |   | - |   |   |   | - |   |
| 3430 | 3 | Bookkeepers, property managers, and legal, statistical and administrative associate professionals |   |   |   |   |   |   |   |   |
| 3431 | 3 | Administrative secretaries and related associate professionals                                    |   |   |   |   |   |   |   |   |
| 3450 | 3 | Police inspectors and detectives                                                                  |   |   | - | - | - |   | - | - |
| 3475 | 3 | Athletes, sports persons and related associate professionals                                      |   |   |   |   |   |   |   |   |
| 3480 | 3 | Religious associate professionals                                                                 |   |   |   |   |   |   |   | - |
| 0016 | 4 | Travel consultants and travel agency clerks                                                       | - |   |   |   |   |   |   |   |
| 0020 | 4 | Cashiers, tellers and other counter clerks                                                        |   |   |   |   |   |   |   |   |
| 0039 | 4 | Data processors and secretaries                                                                   |   |   |   |   |   |   |   |   |
| 0040 | 4 | Unspecified personal services workers                                                             |   |   |   |   |   |   |   |   |
| 4120 | 4 | Numerical clerks                                                                                  |   |   |   |   |   |   |   |   |
| 4130 | 4 | Stock and production clerks                                                                       |   |   |   |   |   |   |   |   |
| 4133 | 4 | Transport clerks                                                                                  | - |   |   |   |   |   |   |   |
| 4142 | 4 | Mail carriers and sorting clerks                                                                  |   |   |   |   |   |   |   |   |
| 4190 | 4 | Other office clerks                                                                               |   |   |   |   |   |   |   |   |
| 4222 | 4 | Receptionists and information clerks                                                              |   |   |   |   |   |   |   |   |
| 4223 | 4 | Telephone switchboard operators                                                                   |   |   |   |   |   |   |   |   |
| 0021 | 5 | Travel attendants and guides                                                                      |   |   |   |   |   |   |   |   |
| 0036 | 5 | Safety and quality inspectors                                                                     |   |   |   |   |   |   |   |   |
| 5112 | 5 | Transport conductors                                                                              |   |   |   |   |   |   |   |   |
| 5121 | 5 | Housekeepers and related workers                                                                  |   |   | - |   |   |   |   |   |
| 5122 | 5 | Cooks                                                                                             |   |   |   |   |   |   |   |   |
| 5123 | 5 | Waiters, waitresses and bartenders                                                                |   |   |   |   |   |   |   |   |
| 5130 | 5 | Nursing and care assistants                                                                       |   |   |   |   |   |   |   |   |
| 5131 | 5 | Child-care workers                                                                                |   |   |   |   |   |   |   |   |
| 5133 | 5 | Home-based personal care workers                                                                  |   |   |   |   |   |   |   |   |

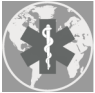

|      |   |                                                                                            |   |   |   |   |   |   |   |   |   |   |   |
|------|---|--------------------------------------------------------------------------------------------|---|---|---|---|---|---|---|---|---|---|---|
| 5139 | 5 | Unspecified personal care and related workers                                              |   | - |   |   |   |   |   |   |   |   |   |
| 5140 | 5 | Hairdressers, barbers, beauticians and related workers                                     |   |   |   |   |   |   |   |   |   |   |   |
| 5161 | 5 | Fire-fighters                                                                              |   |   |   |   |   | - | - |   |   |   |   |
| 5162 | 5 | Police officers                                                                            |   |   |   |   |   |   |   |   |   |   |   |
| 5163 | 5 | Prison guards                                                                              |   |   |   |   |   |   |   |   |   |   |   |
| 5169 | 5 | Unspecified protective services workers                                                    |   |   |   |   |   |   |   |   |   |   |   |
| 5210 | 5 | Fashion and other models                                                                   | - | - | - | - | - | - | - | - | - | - | - |
| 5220 | 5 | Shop, stall and market salespersons and demonstrators                                      |   |   |   |   |   |   |   |   |   |   |   |
| 0003 | 6 | Managers of small enterprises in agriculture, hunting, forestry and fishing, and growers   |   |   |   |   |   |   |   |   |   |   |   |
| 0022 | 6 | Animal producers                                                                           |   |   |   |   |   |   |   |   |   |   |   |
| 6130 | 6 | Crop and animal producers                                                                  |   |   |   |   |   |   |   |   |   |   |   |
| 6140 | 6 | Motorised farm and forestry related workers                                                |   |   |   |   |   | - | - | - | - | - | - |
| 0023 | 7 | Miners, shotfirers, stone cutters, and related plant operators                             |   |   |   |   |   | - | - | - | - | - | - |
| 0024 | 7 | Precision and musical instrument makers, jewellery, glass, ceramics and handicraft workers |   |   |   |   |   |   |   |   |   |   |   |
| 0025 | 7 | Tailors, sewers and other related workers                                                  |   |   |   |   |   |   |   |   |   |   |   |
| 7120 | 7 | Concrete placers, plasterers, concrete finishers and related workers                       |   |   |   |   |   | - | - | - | - | - | - |
| 7121 | 7 | Builders, bricklayers and stonemasons                                                      |   |   |   |   |   | - |   | - | - | - | - |
| 7129 | 7 | Carpenters and building frame and related trades workers                                   |   |   |   |   |   |   |   |   |   |   |   |
| 7130 | 7 | Electricians                                                                               |   |   |   |   |   | - |   |   |   |   |   |
| 7131 | 7 | Roofers                                                                                    |   |   |   |   |   | - | - | - | - | - | - |
| 7132 | 7 | Floor layers and tile setters                                                              |   |   |   |   |   | - | - | - | - | - | - |
| 7134 | 7 | Insulation workers                                                                         |   |   |   |   |   | - | - | - | - | - | - |
| 7135 | 7 | Glaziers                                                                                   |   |   |   |   |   | - | - | - | - | - | - |
| 7136 | 7 | Plumbers and pipe fitters                                                                  |   |   |   |   |   | - |   |   |   |   |   |
| 7140 | 7 | Painters, varnishers and related workers                                                   |   |   |   |   |   |   |   |   |   |   |   |
| 7150 | 7 | Building structure cleaners and caretakers                                                 |   |   |   |   |   | - |   | - | - | - | - |
| 7210 | 7 | Sheet-metal workers                                                                        |   |   |   |   |   | - |   | - | - | - | - |
| 7211 | 7 | Metal moulders and coremakers                                                              |   |   |   |   |   | - | - | - | - | - | - |
| 7212 | 7 | Welders and flame cutters                                                                  |   |   |   |   |   |   |   |   |   |   |   |
| 7214 | 7 | Structural-metal preparers and erectors                                                    | - | - |   |   |   | - | - | - | - | - | - |
| 7215 | 7 | Riggers and cable splicers                                                                 | - | - |   |   |   | - | - | - | - | - | - |
| 7216 | 7 | Underwater workers                                                                         | - | - |   |   |   | - | - | - | - | - | - |
| 7220 | 7 | Blacksmiths, tool-makers and related trades workers and operators                          |   |   |   |   |   |   |   |   |   |   |   |
| 7240 | 7 | Electronics mechanics, fitters and servicers                                               |   |   |   |   |   |   |   |   |   |   |   |
| 7250 | 7 | Installers, servicers and repairers of telephone and electrical lines                      |   |   |   |   |   | - | - |   |   |   |   |

|      |   |                                                                                                  |   |   |   |  |  |   |   |   |   |
|------|---|--------------------------------------------------------------------------------------------------|---|---|---|--|--|---|---|---|---|
| 7341 | 7 | Compositors, typesetters, technical illustrators and related workers                             |   | - |   |  |  |   | - |   |   |
| 7411 | 7 | Butchers, fishmongers and related food preparers                                                 |   |   |   |  |  |   |   |   |   |
| 7420 | 7 | Wood treaters, cabinet-makers and related trades workers                                         |   |   |   |  |  |   |   |   | - |
| 7440 | 7 | Pelt, leather and shoemaking trades workers                                                      | - | - | - |  |  | - | - | - | - |
| 0026 | 8 | Metal- and mineral-products machine operators                                                    |   |   |   |  |  |   | - |   |   |
| 0027 | 8 | Chemical-products machine operators                                                              |   |   |   |  |  |   |   |   |   |
| 0028 | 8 | Rubber- and plastic-products machine operators                                                   |   |   |   |  |  |   |   |   |   |
| 0029 | 8 | Book- and paper- products machine operators                                                      |   |   |   |  |  |   |   | - |   |
| 0030 | 8 | Agricultural or industrial machinery fitters, and mechanical and electrical equipment assemblers |   |   |   |  |  |   |   |   |   |
| 0041 | 8 | Photographic and printing workers and machine operators                                          |   |   |   |  |  |   |   |   |   |
| 0042 | 8 | Bakers and confectionery makers and food and beverage tasters                                    |   |   |   |  |  |   |   |   |   |
| 0043 | 8 | Machine operators of textile, fur and leather                                                    |   |   |   |  |  |   |   |   |   |
| 0044 | 8 | Grocery and beverage machine operators                                                           |   |   |   |  |  |   |   |   |   |
| 8113 | 8 | Mining and mineral-processing-plant operators                                                    |   |   |   |  |  | - | - |   | - |
| 8120 | 8 | Metal-processing plant operators                                                                 |   |   |   |  |  |   |   |   |   |
| 8130 | 8 | Glass, ceramics, paper and related plant operators                                               |   |   |   |  |  | - |   |   |   |
| 8150 | 8 | Chemical-processing-plant operators                                                              |   |   |   |  |  |   |   |   |   |
| 8160 | 8 | Power-production and related plant operators                                                     |   |   |   |  |  | - |   | - |   |
| 8240 | 8 | Wood-products machine and plants operators                                                       |   |   |   |  |  |   |   |   |   |
| 8271 | 8 | Meat- and fish-processing-machine operators                                                      |   |   |   |  |  |   |   |   |   |
| 8272 | 8 | Dairy-products machine operators and workers                                                     |   | - |   |  |  |   |   |   |   |
| 8311 | 8 | Locomotive engine drivers                                                                        |   |   |   |  |  | - | - | - |   |
| 8312 | 8 | Railway brakers, signallers and shunters                                                         |   |   | - |  |  | - | - | - | - |
| 8320 | 8 | Car, taxi, motorcycle and van drivers                                                            |   |   |   |  |  |   |   |   |   |
| 8323 | 8 | Bus and tram drivers                                                                             |   |   |   |  |  |   |   |   |   |
| 8324 | 8 | Heavy truck and lorry drivers                                                                    |   |   |   |  |  |   |   |   |   |
| 8332 | 8 | Earth-moving and related plant operators                                                         |   |   |   |  |  | - |   |   |   |
| 8333 | 8 | Crane, hoist and related plant operators                                                         |   |   |   |  |  | - |   | - | - |
| 8334 | 8 | Lifting-truck operators                                                                          |   |   |   |  |  |   | - | - |   |
| 8340 | 8 | Ships' deck crews and related workers                                                            |   |   |   |  |  | - | - |   | - |
| 0031 | 9 | Watchpersons, meter readers and related workers                                                  |   |   |   |  |  |   |   |   |   |
| 9110 | 9 | Street vendors and related workers                                                               |   |   |   |  |  | - |   |   |   |
| 9130 | 9 | Domestic helpers, cleaners and related workers                                                   |   |   |   |  |  |   |   |   |   |
| 9140 | 9 | Vehicle, window and related cleaners                                                             |   |   |   |  |  |   | - |   |   |
| 9151 | 9 | Messengers, package and luggage porters and deliverers                                           |   |   |   |  |  |   |   |   |   |

|      |   |                                                       |  |  |  |  |  |  |  |  |  |
|------|---|-------------------------------------------------------|--|--|--|--|--|--|--|--|--|
| 9160 | 9 | Garbage collectors and related labourers              |  |  |  |  |  |  |  |  |  |
| 9210 | 9 | Agricultural, fishery, forestry and related labourers |  |  |  |  |  |  |  |  |  |
| 9310 | 9 | Mining and construction labourers                     |  |  |  |  |  |  |  |  |  |
| 9320 | 9 | Manufacturing and transport labourers                 |  |  |  |  |  |  |  |  |  |
| 9330 | 9 | Transport labourers and freight handlers              |  |  |  |  |  |  |  |  |  |

**Table S4.** Heatmap of occupational differences in the age-adjusted one-year cumulative incidence of prolonged SA due to musculoskeletal diseases across three Nordic countries among men and women.

| Code | Major Occupation | Title                                                                                         | Men |    |    | Women |    |    |
|------|------------------|-----------------------------------------------------------------------------------------------|-----|----|----|-------|----|----|
|      |                  |                                                                                               | FI  | NO | SE | FI    | NO | SE |
| 0001 | 1                | Managers in computing services, research and development                                      |     |    |    |       |    |    |
| 0002 | 1                | Managers of wholesale and retail trade and restaurants and hotels                             |     |    |    |       |    |    |
| 0004 | 1                | Managers in manufacturing                                                                     |     |    |    |       |    |    |
| 0005 | 1                | Managers in construction                                                                      |     |    |    |       |    |    |
| 0006 | 1                | Managers in personal care, cleaning and related services                                      | -   |    |    | -     |    |    |
| 0007 | 1                | Managers in storage and communication; business services enterprises, supply and distribution |     |    |    |       |    |    |
| 0008 | 1                | Managers in unspecified enterprises                                                           |     |    |    |       |    |    |
| 1110 | 1                | Legislators and senior government officials                                                   |     |    |    |       |    |    |
| 1120 | 1                | Senior officials of special-interest organizations                                            |     |    |    |       |    |    |
| 1210 | 1                | Directors and chief executives                                                                |     |    |    |       |    |    |
| 1221 | 1                | Production and operations managers in agriculture, hunting, forestry and fishing              |     |    |    | -     |    | -  |
| 1231 | 1                | Finance and administration managers                                                           |     |    |    |       |    |    |
| 1232 | 1                | Personnel and industrial relations managers                                                   |     |    |    |       |    |    |
| 1233 | 1                | Sales and marketing managers                                                                  |     |    |    |       |    |    |
| 1234 | 1                | Advertising and public relations managers                                                     |     |    |    |       |    |    |
| 1239 | 1                | Other unspecified specialist managers                                                         |     |    |    |       |    |    |
| 0009 | 2                | Translators and interpreters; journalists and other writers; radio and other announcers       |     |    |    |       |    |    |
| 0011 | 2                | Nursing and midwifery professionals and associate professionals                               |     |    |    |       |    |    |
| 0012 | 2                | Education methods specialists and inspectors, and unspecified teaching professionals          |     |    |    |       |    |    |
| 0014 | 2                | Social scientists, philosophers and historians                                                |     |    |    |       |    |    |
| 0015 | 2                | Physiotherapists and unspecified health professionals                                         |     |    |    |       |    |    |
| 0019 | 2                | Sculptors, painters and commercial designers                                                  |     |    |    |       |    |    |
| 0032 | 2                | Physicists, astronomers and meteorologists                                                    |     |    |    |       |    |    |
| 0033 | 2                | Mathematicians, statisticians and related professionals                                       |     |    |    |       |    |    |
| 0034 | 2                | Lawyers, judges and other legal professionals                                                 |     |    |    |       |    |    |
| 0037 | 2                | Agronomy and forestry advisers and technicians                                                |     |    |    |       |    |    |
| 2113 | 2                | Chemists                                                                                      |     |    |    |       |    |    |
| 2114 | 2                | Geologists and geophysicists                                                                  |     |    |    |       |    |    |
| 2130 | 2                | Computing professionals                                                                       |     |    |    |       |    |    |
| 2141 | 2                | Architects, town and traffic planners                                                         |     |    |    |       |    |    |



|      |   |                                                                                                  |   |  |  |  |  |  |  |
|------|---|--------------------------------------------------------------------------------------------------|---|--|--|--|--|--|--|
| 2142 | 2 | Civil engineers                                                                                  |   |  |  |  |  |  |  |
| 2143 | 2 | Electrical engineers                                                                             |   |  |  |  |  |  |  |
| 2144 | 2 | Electronics and telecommunications engineers                                                     |   |  |  |  |  |  |  |
| 2145 | 2 | Mechanical engineers                                                                             |   |  |  |  |  |  |  |
| 2146 | 2 | Chemical engineers                                                                               |   |  |  |  |  |  |  |
| 2147 | 2 | Mining engineers, metallurgists and related professionals                                        |   |  |  |  |  |  |  |
| 2148 | 2 | Cartographers and surveyors                                                                      |   |  |  |  |  |  |  |
| 2149 | 2 | Architects, engineers and unspecified related professionals                                      |   |  |  |  |  |  |  |
| 2210 | 2 | Agronomists, forestry professionals and related professionals                                    |   |  |  |  |  |  |  |
| 2211 | 2 | Biologists, botanists, zoologists and related professionals                                      |   |  |  |  |  |  |  |
| 2212 | 2 | Pharmacologists, pathologists and related professionals                                          |   |  |  |  |  |  |  |
| 2221 | 2 | Medical doctors                                                                                  |   |  |  |  |  |  |  |
| 2222 | 2 | Dentists                                                                                         |   |  |  |  |  |  |  |
| 2223 | 2 | Veterinarians                                                                                    | - |  |  |  |  |  |  |
| 2310 | 2 | College, university and higher education teaching professionals                                  |   |  |  |  |  |  |  |
| 2320 | 2 | Secondary education teaching professionals                                                       |   |  |  |  |  |  |  |
| 2330 | 2 | Primary education teaching professionals and associate professionals                             |   |  |  |  |  |  |  |
| 2340 | 2 | Special education teaching professionals                                                         |   |  |  |  |  |  |  |
| 2410 | 2 | Market research, organizational analysts and unspecified business professionals                  |   |  |  |  |  |  |  |
| 2411 | 2 | Accountants                                                                                      |   |  |  |  |  |  |  |
| 2431 | 2 | Archivists and curators                                                                          |   |  |  |  |  |  |  |
| 2432 | 2 | Librarians and related information professionals                                                 |   |  |  |  |  |  |  |
| 2441 | 2 | Economists                                                                                       |   |  |  |  |  |  |  |
| 2445 | 2 | Journalists and other writers; radio and other announcers                                        |   |  |  |  |  |  |  |
| 2453 | 2 | Composers, musicians and singers                                                                 | - |  |  |  |  |  |  |
| 2455 | 2 | Film, stage and related actors and directors                                                     |   |  |  |  |  |  |  |
| 2460 | 2 | Religious professionals                                                                          |   |  |  |  |  |  |  |
| 2470 | 2 | Public service administrative professionals                                                      |   |  |  |  |  |  |  |
| 0010 | 3 | Dietician, nutritionists, optometrists, opticians and unspecified health associate professionals |   |  |  |  |  |  |  |
| 0013 | 3 | Personnel and careers professionals; employment agents, labour contractors                       |   |  |  |  |  |  |  |
| 0017 | 3 | Appraisers, auctioneers and unspecified associate professionals in finance and sales             |   |  |  |  |  |  |  |
| 0018 | 3 | Choreographers, dancers, creative and performing artists                                         |   |  |  |  |  |  |  |
| 0035 | 3 | Professionals and associate professionals in social work                                         |   |  |  |  |  |  |  |
| 0038 | 3 | Customs, tax and related government associate professionals                                      |   |  |  |  |  |  |  |
| 3110 | 3 | Chemical and physical science and engineering technicians                                        |   |  |  |  |  |  |  |



|      |   |                                                                                                   |  |  |  |  |  |  |  |
|------|---|---------------------------------------------------------------------------------------------------|--|--|--|--|--|--|--|
| 3112 | 3 | Civil engineering technicians                                                                     |  |  |  |  |  |  |  |
| 3113 | 3 | Electrical engineering technicians                                                                |  |  |  |  |  |  |  |
| 3114 | 3 | Electronics and telecommunications engineering technicians                                        |  |  |  |  |  |  |  |
| 3115 | 3 | Mechanical engineering technicians                                                                |  |  |  |  |  |  |  |
| 3117 | 3 | Mining and metallurgical technicians                                                              |  |  |  |  |  |  |  |
| 3119 | 3 | Unspecified physical and engineering science technicians                                          |  |  |  |  |  |  |  |
| 3120 | 3 | Computer assistants, computer equipment operators and related associate professionals             |  |  |  |  |  |  |  |
| 3130 | 3 | Photographers and image and sound recording equipment operators                                   |  |  |  |  |  |  |  |
| 3132 | 3 | Broadcasting and telecommunications equipment operators                                           |  |  |  |  |  |  |  |
| 3139 | 3 | Unspecified optical, medical and electronic equipment operators                                   |  |  |  |  |  |  |  |
| 3140 | 3 | Air traffic controllers and safety technicians                                                    |  |  |  |  |  |  |  |
| 3141 | 3 | Ships' engineers                                                                                  |  |  |  |  |  |  |  |
| 3142 | 3 | Ships' deck officers and pilots                                                                   |  |  |  |  |  |  |  |
| 3143 | 3 | Aircraft pilots and related associate professionals                                               |  |  |  |  |  |  |  |
| 3210 | 3 | Life science technicians                                                                          |  |  |  |  |  |  |  |
| 3220 | 3 | Medical assistants, hygienists, health and environmental officers                                 |  |  |  |  |  |  |  |
| 3225 | 3 | Dental assistants                                                                                 |  |  |  |  |  |  |  |
| 3227 | 3 | Veterinary assistants                                                                             |  |  |  |  |  |  |  |
| 3228 | 3 | Pharmaceutical assistants                                                                         |  |  |  |  |  |  |  |
| 3320 | 3 | Pre-primary education teaching professionals and associate professionals                          |  |  |  |  |  |  |  |
| 3340 | 3 | Teaching associate professionals                                                                  |  |  |  |  |  |  |  |
| 3411 | 3 | Securities and finance dealers and brokers                                                        |  |  |  |  |  |  |  |
| 3412 | 3 | Insurance representatives                                                                         |  |  |  |  |  |  |  |
| 3413 | 3 | Estate agents                                                                                     |  |  |  |  |  |  |  |
| 3415 | 3 | Technical and commercial sales representatives                                                    |  |  |  |  |  |  |  |
| 3416 | 3 | Buyers                                                                                            |  |  |  |  |  |  |  |
| 3421 | 3 | Trade brokers                                                                                     |  |  |  |  |  |  |  |
| 3422 | 3 | Clearing and forwarding agents                                                                    |  |  |  |  |  |  |  |
| 3429 | 3 | Unspecified business services agents and trade brokers                                            |  |  |  |  |  |  |  |
| 3430 | 3 | Bookkeepers, property managers, and legal, statistical and administrative associate professionals |  |  |  |  |  |  |  |
| 3431 | 3 | Administrative secretaries and related associate professionals                                    |  |  |  |  |  |  |  |
| 3450 | 3 | Police inspectors and detectives                                                                  |  |  |  |  |  |  |  |
| 3475 | 3 | Athletes, sports persons and related associate professionals                                      |  |  |  |  |  |  |  |
| 3480 | 3 | Religious associate professionals                                                                 |  |  |  |  |  |  |  |
| 0016 | 4 | Travel consultants and travel agency clerks                                                       |  |  |  |  |  |  |  |

|      |   |                                                                                            |   |   |   |  |   |   |   |
|------|---|--------------------------------------------------------------------------------------------|---|---|---|--|---|---|---|
| 0020 | 4 | Cashiers, tellers and other counter clerks                                                 |   |   |   |  |   |   |   |
| 0039 | 4 | Data processors and secretaries                                                            |   |   |   |  |   |   |   |
| 0040 | 4 | Unspecified personal services workers                                                      |   |   |   |  |   |   |   |
| 4120 | 4 | Numerical clerks                                                                           |   |   |   |  |   |   |   |
| 4130 | 4 | Stock and production clerks                                                                |   |   |   |  |   |   |   |
| 4133 | 4 | Transport clerks                                                                           |   |   |   |  |   |   |   |
| 4142 | 4 | Mail carriers and sorting clerks                                                           |   |   |   |  |   |   |   |
| 4190 | 4 | Other office clerks                                                                        |   |   |   |  |   |   |   |
| 4222 | 4 | Receptionists and information clerks                                                       |   |   |   |  |   |   |   |
| 4223 | 4 | Telephone switchboard operators                                                            |   |   |   |  |   |   |   |
| 0021 | 5 | Travel attendants and guides                                                               |   |   |   |  |   |   |   |
| 0036 | 5 | Safety and quality inspectors                                                              |   |   |   |  |   |   |   |
| 5112 | 5 | Transport conductors                                                                       |   |   |   |  |   |   |   |
| 5121 | 5 | Housekeepers and related workers                                                           |   | - |   |  |   |   |   |
| 5122 | 5 | Cooks                                                                                      |   |   |   |  |   |   |   |
| 5123 | 5 | Waiters, waitresses and bartenders                                                         |   |   |   |  |   |   |   |
| 5130 | 5 | Nursing and care assistants                                                                |   |   |   |  |   |   |   |
| 5131 | 5 | Child-care workers                                                                         |   |   |   |  |   |   |   |
| 5133 | 5 | Home-based personal care workers                                                           |   |   |   |  |   |   |   |
| 5139 | 5 | Unspecified personal care and related workers                                              | - |   |   |  |   |   |   |
| 5140 | 5 | Hairdressers, barbers, beauticians and related workers                                     |   |   |   |  |   |   |   |
| 5161 | 5 | Fire-fighters                                                                              |   |   |   |  | - |   |   |
| 5162 | 5 | Police officers                                                                            |   |   |   |  |   |   |   |
| 5163 | 5 | Prison guards                                                                              |   |   |   |  |   |   |   |
| 5169 | 5 | Unspecified protective services workers                                                    |   |   |   |  |   |   |   |
| 5210 | 5 | Fashion and other models                                                                   | - | - | - |  | - | - | - |
| 5220 | 5 | Shop, stall and market salespersons and demonstrators                                      |   |   |   |  |   |   |   |
| 0003 | 6 | Managers of small enterprises in agriculture, hunting, forestry and fishing, and growers   |   |   |   |  |   |   |   |
| 0022 | 6 | Animal producers                                                                           |   |   |   |  |   |   |   |
| 6130 | 6 | Crop and animal producers                                                                  |   |   |   |  |   |   |   |
| 6140 | 6 | Motorised farm and forestry related workers                                                |   |   |   |  |   | - |   |
| 0023 | 7 | Miners, shotfirers, stone cutters, and related plant operators                             |   |   |   |  | - | - |   |
| 0024 | 7 | Precision and musical instrument makers, jewellery, glass, ceramics and handicraft workers |   |   |   |  |   |   |   |
| 0025 | 7 | Tailors, sewers and other related workers                                                  |   |   |   |  |   |   |   |
| 7120 | 7 | Concrete placers, plasterers, concrete finishers and related workers                       |   |   |   |  | - | - | - |

|      |   |                                                                                                  |   |   |   |   |   |   |
|------|---|--------------------------------------------------------------------------------------------------|---|---|---|---|---|---|
| 7121 | 7 | Builders, bricklayers and stonemasons                                                            |   |   |   |   | - | - |
| 7129 | 7 | Carpenters and building frame and related trades workers                                         |   |   |   |   |   |   |
| 7130 | 7 | Electricians                                                                                     |   |   |   |   |   |   |
| 7131 | 7 | Roofers                                                                                          |   |   |   | - | - | - |
| 7132 | 7 | Floor layers and tile setters                                                                    |   | - |   | - | - | - |
| 7134 | 7 | Insulation workers                                                                               |   |   |   | - | - | - |
| 7135 | 7 | Glaziers                                                                                         |   |   |   | - | - | - |
| 7136 | 7 | Plumbers and pipe fitters                                                                        |   |   |   |   |   | - |
| 7140 | 7 | Painters, varnishers and related workers                                                         |   |   |   |   |   |   |
| 7150 | 7 | Building structure cleaners and caretakers                                                       |   |   |   |   | - |   |
| 7210 | 7 | Sheet-metal workers                                                                              |   |   |   |   | - | - |
| 7211 | 7 | Metal moulders and coremakers                                                                    |   |   |   | - | - | - |
| 7212 | 7 | Welders and flame cutters                                                                        |   |   |   |   |   |   |
| 7214 | 7 | Structural-metal preparers and erectors                                                          | - |   |   |   |   |   |
| 7215 | 7 | Riggers and cable splicers                                                                       | - |   | - | - | - | - |
| 7216 | 7 | Underwater workers                                                                               | - |   |   | - | - | - |
| 7220 | 7 | Blacksmiths, tool-makers and related trades workers and operators                                |   |   |   |   | - |   |
| 7240 | 7 | Electronics mechanics, fitters and servicers                                                     |   |   |   |   | - |   |
| 7250 | 7 | Installers, servicers and repairers of telephone and electrical lines                            |   |   |   | - |   | - |
| 7341 | 7 | Compositors, typesetters, technical illustrators and related workers                             | - |   |   | - |   |   |
| 7411 | 7 | Butchers, fishmongers and related food preparers                                                 |   |   |   |   |   |   |
| 7420 | 7 | Wood treaters, cabinet-makers and related trades workers                                         |   |   |   |   |   | - |
| 7440 | 7 | Pelt, leather and shoemaking trades workers                                                      | - | - |   | - | - | - |
| 0026 | 8 | Metal- and mineral-products machine operators                                                    |   |   |   |   |   |   |
| 0027 | 8 | Chemical-products machine operators                                                              |   |   |   |   |   |   |
| 0028 | 8 | Rubber- and plastic-products machine operators                                                   |   |   |   |   |   |   |
| 0029 | 8 | Book- and paper- products machine operators                                                      |   |   |   |   | - |   |
| 0030 | 8 | Agricultural or industrial machinery fitters, and mechanical and electrical equipment assemblers |   |   |   |   |   |   |
| 0041 | 8 | Photographic and printing workers and machine operators                                          |   |   |   |   |   |   |
| 0042 | 8 | Bakers and confectionery makers and food and beverage tasters                                    |   |   |   |   |   |   |
| 0043 | 8 | Machine operators of textile, fur and leather                                                    |   |   |   |   |   |   |
| 0044 | 8 | Grocery and beverage machine operators                                                           |   |   |   |   |   |   |
| 8113 | 8 | Mining and mineral-processing-plant operators                                                    |   |   |   | - |   | - |
| 8120 | 8 | Metal-processing plant operators                                                                 |   |   |   |   |   |   |
| 8130 | 8 | Glass, ceramics, paper and related plant operators                                               |   |   |   |   |   |   |

|      |   |                                                        |   |   |  |   |   |   |
|------|---|--------------------------------------------------------|---|---|--|---|---|---|
| 8150 | 8 | Chemical-processing-plant operators                    |   |   |  |   |   |   |
| 8160 | 8 | Power-production and related plant operators           |   |   |  | - |   |   |
| 8240 | 8 | Wood-products machine and plants operators             |   |   |  |   |   |   |
| 8271 | 8 | Meat- and fish-processing-machine operators            |   |   |  |   |   |   |
| 8272 | 8 | Dairy-products machine operators and workers           | - |   |  |   |   |   |
| 8311 | 8 | Locomotive engine drivers                              |   |   |  | - | - |   |
| 8312 | 8 | Railway brakemen, signallers and shunters              |   | - |  | - | - | - |
| 8320 | 8 | Car, taxi, motorcycle and van drivers                  |   |   |  |   |   |   |
| 8323 | 8 | Bus and tram drivers                                   |   |   |  |   |   |   |
| 8324 | 8 | Heavy truck and lorry drivers                          |   |   |  |   |   |   |
| 8332 | 8 | Earth-moving and related plant operators               |   |   |  |   |   |   |
| 8333 | 8 | Crane, hoist and related plant operators               |   |   |  |   | - | - |
| 8334 | 8 | Lifting-truck operators                                |   |   |  | - | - |   |
| 8340 | 8 | Ships' deck crews and related workers                  |   |   |  | - |   | - |
| 0031 | 9 | Watchpersons, meter readers and related workers        |   |   |  |   |   |   |
| 9110 | 9 | Street vendors and related workers                     |   |   |  |   |   |   |
| 9130 | 9 | Domestic helpers, cleaners and related workers         |   |   |  |   |   |   |
| 9140 | 9 | Vehicle, window and related cleaners                   |   |   |  | - |   |   |
| 9151 | 9 | Messengers, package and luggage porters and deliverers |   |   |  |   |   |   |
| 9160 | 9 | Garbage collectors and related labourers               |   |   |  | - |   |   |
| 9210 | 9 | Agricultural, fishery, forestry and related labourers  |   |   |  |   |   |   |
| 9310 | 9 | Mining and construction labourers                      |   |   |  |   |   |   |
| 9320 | 9 | Manufacturing and transport labourers                  |   |   |  |   |   |   |
| 9330 | 9 | Transport labourers and freight handlers               |   |   |  |   |   |   |

**Table S5.** Heatmap of occupational differences in the age-adjusted one-year cumulative incidence of prolonged SA due to mental disorders across three Nordic countries among men and women.

| Code | Major Occupation | Title                                                                                         | Men |    |    | Women |    |    |
|------|------------------|-----------------------------------------------------------------------------------------------|-----|----|----|-------|----|----|
|      |                  |                                                                                               | FI  | NO | SE | FI    | NO | SE |
| 0001 | 1                | Managers in computing services, research and development                                      |     |    |    |       |    |    |
| 0002 | 1                | Managers of wholesale and retail trade and restaurants and hotels                             |     |    |    |       |    |    |
| 0004 | 1                | Managers in manufacturing                                                                     |     |    |    |       |    |    |
| 0005 | 1                | Managers in construction                                                                      |     |    |    |       |    |    |
| 0006 | 1                | Managers in personal care, cleaning and related services                                      | -   |    |    | -     |    |    |
| 0007 | 1                | Managers in storage and communication; business services enterprises, supply and distribution |     |    |    |       |    |    |
| 0008 | 1                | Managers in unspecified enterprises                                                           |     |    |    |       |    |    |
| 1110 | 1                | Legislators and senior government officials                                                   |     |    |    |       |    |    |
| 1120 | 1                | Senior officials of special-interest organizations                                            |     |    |    |       |    |    |
| 1210 | 1                | Directors and chief executives                                                                |     |    |    |       |    |    |
| 1221 | 1                | Production and operations managers in agriculture, hunting, forestry and fishing              |     |    |    | -     |    | -  |
| 1231 | 1                | Finance and administration managers                                                           |     |    |    |       |    |    |
| 1232 | 1                | Personnel and industrial relations managers                                                   |     |    |    |       |    |    |
| 1233 | 1                | Sales and marketing managers                                                                  |     |    |    |       |    |    |
| 1234 | 1                | Advertising and public relations managers                                                     |     |    |    |       |    |    |
| 1239 | 1                | Other unspecified specialist managers                                                         |     |    |    |       |    |    |
| 0009 | 2                | Translators and interpreters; journalists and other writers; radio and other announcers       |     |    |    |       |    |    |
| 0011 | 2                | Nursing and midwifery professionals and associate professionals                               |     |    |    |       |    |    |
| 0012 | 2                | Education methods specialists and inspectors, and unspecified teaching professionals          |     |    |    |       |    |    |
| 0014 | 2                | Social scientists, philosophers and historians                                                |     |    |    |       |    |    |
| 0015 | 2                | Physiotherapists and unspecified health professionals                                         |     |    |    |       |    |    |
| 0019 | 2                | Sculptors, painters and commercial designers                                                  |     |    |    |       |    |    |
| 0032 | 2                | Physicists, astronomers and meteorologists                                                    |     |    |    |       | -1 |    |
| 0033 | 2                | Mathematicians, statisticians and related professionals                                       |     |    |    |       |    |    |
| 0034 | 2                | Lawyers, judges and other legal professionals                                                 |     |    |    |       |    |    |
| 0037 | 2                | Agronomy and forestry advisers and technicians                                                |     |    |    |       |    |    |
| 2113 | 2                | Chemists                                                                                      |     |    |    |       |    |    |
| 2114 | 2                | Geologists and geophysicists                                                                  |     |    |    |       |    |    |
| 2130 | 2                | Computing professionals                                                                       |     |    |    |       | -1 |    |
| 2141 | 2                | Architects, town and traffic planners                                                         |     |    |    |       |    |    |

|      |   |                                                                                                  |  |  |  |  |  |  |  |
|------|---|--------------------------------------------------------------------------------------------------|--|--|--|--|--|--|--|
| 2142 | 2 | Civil engineers                                                                                  |  |  |  |  |  |  |  |
| 2143 | 2 | Electrical engineers                                                                             |  |  |  |  |  |  |  |
| 2144 | 2 | Electronics and telecommunications engineers                                                     |  |  |  |  |  |  |  |
| 2145 | 2 | Mechanical engineers                                                                             |  |  |  |  |  |  |  |
| 2146 | 2 | Chemical engineers                                                                               |  |  |  |  |  |  |  |
| 2147 | 2 | Mining engineers, metallurgists and related professionals                                        |  |  |  |  |  |  |  |
| 2148 | 2 | Cartographers and surveyors                                                                      |  |  |  |  |  |  |  |
| 2149 | 2 | Architects, engineers and unspecified related professionals                                      |  |  |  |  |  |  |  |
| 2210 | 2 | Agronomists, forestry professionals and related professionals                                    |  |  |  |  |  |  |  |
| 2211 | 2 | Biologists, botanists, zoologists and related professionals                                      |  |  |  |  |  |  |  |
| 2212 | 2 | Pharmacologists, pathologists and related professionals                                          |  |  |  |  |  |  |  |
| 2221 | 2 | Medical doctors                                                                                  |  |  |  |  |  |  |  |
| 2222 | 2 | Dentists                                                                                         |  |  |  |  |  |  |  |
| 2223 | 2 | Veterinarians                                                                                    |  |  |  |  |  |  |  |
| 2310 | 2 | College, university and higher education teaching professionals                                  |  |  |  |  |  |  |  |
| 2320 | 2 | Secondary education teaching professionals                                                       |  |  |  |  |  |  |  |
| 2330 | 2 | Primary education teaching professionals and associate professionals                             |  |  |  |  |  |  |  |
| 2340 | 2 | Special education teaching professionals                                                         |  |  |  |  |  |  |  |
| 2410 | 2 | Market research, organizational analysts and unspecified business professionals                  |  |  |  |  |  |  |  |
| 2411 | 2 | Accountants                                                                                      |  |  |  |  |  |  |  |
| 2431 | 2 | Archivists and curators                                                                          |  |  |  |  |  |  |  |
| 2432 | 2 | Librarians and related information professionals                                                 |  |  |  |  |  |  |  |
| 2441 | 2 | Economists                                                                                       |  |  |  |  |  |  |  |
| 2445 | 2 | Journalists and other writers; radio and other announcers                                        |  |  |  |  |  |  |  |
| 2453 | 2 | Composers, musicians and singers                                                                 |  |  |  |  |  |  |  |
| 2455 | 2 | Film, stage and related actors and directors                                                     |  |  |  |  |  |  |  |
| 2460 | 2 | Religious professionals                                                                          |  |  |  |  |  |  |  |
| 2470 | 2 | Public service administrative professionals                                                      |  |  |  |  |  |  |  |
| 0010 | 3 | Dietician, nutritionists, optometrists, opticians and unspecified health associate professionals |  |  |  |  |  |  |  |
| 0013 | 3 | Personnel and careers professionals; employment agents, labour contractors                       |  |  |  |  |  |  |  |
| 0017 | 3 | Appraisers, auctioneers and unspecified associate professionals in finance and sales             |  |  |  |  |  |  |  |
| 0018 | 3 | Choreographers, dancers, creative and performing artists                                         |  |  |  |  |  |  |  |
| 0035 | 3 | Professionals and associate professionals in social work                                         |  |  |  |  |  |  |  |
| 0038 | 3 | Customs, tax and related government associate professionals                                      |  |  |  |  |  |  |  |
| 3110 | 3 | Chemical and physical science and engineering technicians                                        |  |  |  |  |  |  |  |

|      |   |                                                                                                   |  |  |  |  |  |  |
|------|---|---------------------------------------------------------------------------------------------------|--|--|--|--|--|--|
| 3112 | 3 | Civil engineering technicians                                                                     |  |  |  |  |  |  |
| 3113 | 3 | Electrical engineering technicians                                                                |  |  |  |  |  |  |
| 3114 | 3 | Electronics and telecommunications engineering technicians                                        |  |  |  |  |  |  |
| 3115 | 3 | Mechanical engineering technicians                                                                |  |  |  |  |  |  |
| 3117 | 3 | Mining and metallurgical technicians                                                              |  |  |  |  |  |  |
| 3119 | 3 | Unspecified physical and engineering science technicians                                          |  |  |  |  |  |  |
| 3120 | 3 | Computer assistants, computer equipment operators and related associate professionals             |  |  |  |  |  |  |
| 3130 | 3 | Photographers and image and sound recording equipment operators                                   |  |  |  |  |  |  |
| 3132 | 3 | Broadcasting and telecommunications equipment operators                                           |  |  |  |  |  |  |
| 3139 | 3 | Unspecified optical, medical and electronic equipment operators                                   |  |  |  |  |  |  |
| 3140 | 3 | Air traffic controllers and safety technicians                                                    |  |  |  |  |  |  |
| 3141 | 3 | Ships' engineers                                                                                  |  |  |  |  |  |  |
| 3142 | 3 | Ships' deck officers and pilots                                                                   |  |  |  |  |  |  |
| 3143 | 3 | Aircraft pilots and related associate professionals                                               |  |  |  |  |  |  |
| 3210 | 3 | Life science technicians                                                                          |  |  |  |  |  |  |
| 3220 | 3 | Medical assistants, hygienists, health and environmental officers                                 |  |  |  |  |  |  |
| 3225 | 3 | Dental assistants                                                                                 |  |  |  |  |  |  |
| 3227 | 3 | Veterinary assistants                                                                             |  |  |  |  |  |  |
| 3228 | 3 | Pharmaceutical assistants                                                                         |  |  |  |  |  |  |
| 3320 | 3 | Pre-primary education teaching professionals and associate professionals                          |  |  |  |  |  |  |
| 3340 | 3 | Teaching associate professionals                                                                  |  |  |  |  |  |  |
| 3411 | 3 | Securities and finance dealers and brokers                                                        |  |  |  |  |  |  |
| 3412 | 3 | Insurance representatives                                                                         |  |  |  |  |  |  |
| 3413 | 3 | Estate agents                                                                                     |  |  |  |  |  |  |
| 3415 | 3 | Technical and commercial sales representatives                                                    |  |  |  |  |  |  |
| 3416 | 3 | Buyers                                                                                            |  |  |  |  |  |  |
| 3421 | 3 | Trade brokers                                                                                     |  |  |  |  |  |  |
| 3422 | 3 | Clearing and forwarding agents                                                                    |  |  |  |  |  |  |
| 3429 | 3 | Unspecified business services agents and trade brokers                                            |  |  |  |  |  |  |
| 3430 | 3 | Bookkeepers, property managers, and legal, statistical and administrative associate professionals |  |  |  |  |  |  |
| 3431 | 3 | Administrative secretaries and related associate professionals                                    |  |  |  |  |  |  |
| 3450 | 3 | Police inspectors and detectives                                                                  |  |  |  |  |  |  |
| 3475 | 3 | Athletes, sports persons and related associate professionals                                      |  |  |  |  |  |  |
| 3480 | 3 | Religious associate professionals                                                                 |  |  |  |  |  |  |
| 0016 | 4 | Travel consultants and travel agency clerks                                                       |  |  |  |  |  |  |

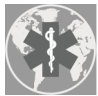

|      |   |                                                                                            |   |    |  |  |    |   |
|------|---|--------------------------------------------------------------------------------------------|---|----|--|--|----|---|
| 0020 | 4 | Cashiers, tellers and other counter clerks                                                 |   |    |  |  |    |   |
| 0039 | 4 | Data processors and secretaries                                                            |   |    |  |  |    |   |
| 0040 | 4 | Unspecified personal services workers                                                      |   | -1 |  |  |    |   |
| 4120 | 4 | Numerical clerks                                                                           |   | -1 |  |  |    |   |
| 4130 | 4 | Stock and production clerks                                                                |   |    |  |  |    |   |
| 4133 | 4 | Transport clerks                                                                           |   |    |  |  |    |   |
| 4142 | 4 | Mail carriers and sorting clerks                                                           |   |    |  |  |    |   |
| 4190 | 4 | Other office clerks                                                                        |   |    |  |  |    |   |
| 4222 | 4 | Receptionists and information clerks                                                       |   |    |  |  |    |   |
| 4223 | 4 | Telephone switchboard operators                                                            |   |    |  |  |    |   |
| 0021 | 5 | Travel attendants and guides                                                               |   |    |  |  |    |   |
| 0036 | 5 | Safety and quality inspectors                                                              |   |    |  |  |    |   |
| 5112 | 5 | Transport conductors                                                                       |   |    |  |  | -1 |   |
| 5121 | 5 | Housekeepers and related workers                                                           |   |    |  |  |    |   |
| 5122 | 5 | Cooks                                                                                      |   | -1 |  |  | -1 |   |
| 5123 | 5 | Waiters, waitresses and bartenders                                                         |   |    |  |  |    |   |
| 5130 | 5 | Nursing and care assistants                                                                |   |    |  |  |    |   |
| 5131 | 5 | Child-care workers                                                                         |   | -1 |  |  | -1 |   |
| 5133 | 5 | Home-based personal care workers                                                           |   |    |  |  |    |   |
| 5139 | 5 | Unspecified personal care and related workers                                              | - |    |  |  |    |   |
| 5140 | 5 | Hairdressers, barbers, beauticians and related workers                                     |   |    |  |  |    |   |
| 5161 | 5 | Fire-fighters                                                                              |   |    |  |  | -  |   |
| 5162 | 5 | Police officers                                                                            |   |    |  |  |    |   |
| 5163 | 5 | Prison guards                                                                              |   |    |  |  |    |   |
| 5169 | 5 | Unspecified protective services workers                                                    |   |    |  |  |    |   |
| 5210 | 5 | Fashion and other models                                                                   | - |    |  |  | -  | - |
| 5220 | 5 | Shop, stall and market salespersons and demonstrators                                      |   |    |  |  |    |   |
| 0003 | 6 | Managers of small enterprises in agriculture, hunting, forestry and fishing, and growers   |   |    |  |  |    |   |
| 0022 | 6 | Animal producers                                                                           |   | -1 |  |  |    |   |
| 6130 | 6 | Crop and animal producers                                                                  |   |    |  |  |    |   |
| 6140 | 6 | Motorised farm and forestry related workers                                                |   |    |  |  |    |   |
| 0023 | 7 | Miners, shotfirers, stone cutters, and related plant operators                             |   |    |  |  | -  |   |
| 0024 | 7 | Precision and musical instrument makers, jewellery, glass, ceramics and handicraft workers |   |    |  |  |    |   |
| 0025 | 7 | Tailors, sewers and other related workers                                                  |   |    |  |  |    |   |
| 7120 | 7 | Concrete placers, plasterers, concrete finishers and related workers                       |   |    |  |  | -  | - |

|      |   |                                                                                                  |   |    |   |   |    |   |
|------|---|--------------------------------------------------------------------------------------------------|---|----|---|---|----|---|
| 7121 | 7 | Builders, bricklayers and stonemasons                                                            |   |    |   |   |    | - |
| 7129 | 7 | Carpenters and building frame and related trades workers                                         |   |    |   |   |    |   |
| 7130 | 7 | Electricians                                                                                     |   |    |   |   |    |   |
| 7131 | 7 | Roofers                                                                                          |   |    |   | - |    | - |
| 7132 | 7 | Floor layers and tile setters                                                                    |   |    |   | - |    | - |
| 7134 | 7 | Insulation workers                                                                               |   | -1 |   | - | -1 | - |
| 7135 | 7 | Glaziers                                                                                         |   |    |   | - |    | - |
| 7136 | 7 | Plumbers and pipe fitters                                                                        |   |    |   |   |    | - |
| 7140 | 7 | Painters, varnishers and related workers                                                         |   |    |   |   | -1 |   |
| 7150 | 7 | Building structure cleaners and caretakers                                                       |   |    |   |   | -1 |   |
| 7210 | 7 | Sheet-metal workers                                                                              |   |    |   |   | -1 | - |
| 7211 | 7 | Metal moulders and coremakers                                                                    |   |    |   | - |    | - |
| 7212 | 7 | Welders and flame cutters                                                                        |   |    |   |   |    |   |
| 7214 | 7 | Structural-metal preparers and erectors                                                          | - |    |   |   | -1 |   |
| 7215 | 7 | Riggers and cable splicers                                                                       | - | -1 | - | - | -1 | - |
| 7216 | 7 | Underwater workers                                                                               | - |    |   | - | -1 | - |
| 7220 | 7 | Blacksmiths, tool-makers and related trades workers and operators                                |   |    |   |   | -1 |   |
| 7240 | 7 | Electronics mechanics, fitters and servicers                                                     |   |    |   |   |    |   |
| 7250 | 7 | Installers, servicers and repairers of telephone and electrical lines                            |   |    |   | - |    | - |
| 7341 | 7 | Compositors, typesetters, technical illustrators and related workers                             | - |    |   | - | -1 |   |
| 7411 | 7 | Butchers, fishmongers and related food preparers                                                 |   |    |   |   | -1 |   |
| 7420 | 7 | Wood treaters, cabinet-makers and related trades workers                                         |   |    |   |   | -1 | - |
| 7440 | 7 | Pelt, leather and shoemaking trades workers                                                      | - |    |   | - |    | - |
| 0026 | 8 | Metal- and mineral-products machine operators                                                    |   |    |   | - |    |   |
| 0027 | 8 | Chemical-products machine operators                                                              |   |    |   |   | -1 |   |
| 0028 | 8 | Rubber- and plastic-products machine operators                                                   |   |    |   |   | -1 |   |
| 0029 | 8 | Book- and paper- products machine operators                                                      |   |    |   |   | -1 |   |
| 0030 | 8 | Agricultural or industrial machinery fitters, and mechanical and electrical equipment assemblers |   |    |   |   | -1 |   |
| 0041 | 8 | Photographic and printing workers and machine operators                                          |   |    |   |   |    |   |
| 0042 | 8 | Bakers and confectionery makers and food and beverage tasters                                    |   |    |   |   |    |   |
| 0043 | 8 | Machine operators of textile, fur and leather                                                    |   |    |   |   |    |   |
| 0044 | 8 | Grocery and beverage machine operators                                                           |   |    |   |   |    |   |
| 8113 | 8 | Mining and mineral-processing-plant operators                                                    |   | -1 |   | - | -1 | - |
| 8120 | 8 | Metal-processing plant operators                                                                 |   |    |   |   |    |   |
| 8130 | 8 | Glass, ceramics, paper and related plant operators                                               |   |    |   |   |    |   |



|      |   |                                                        |   |    |  |   |    |   |
|------|---|--------------------------------------------------------|---|----|--|---|----|---|
| 8150 | 8 | Chemical-processing-plant operators                    |   |    |  |   |    |   |
| 8160 | 8 | Power-production and related plant operators           |   |    |  |   |    |   |
| 8240 | 8 | Wood-products machine and plants operators             |   |    |  |   | -1 |   |
| 8271 | 8 | Meat- and fish-processing-machine operators            |   |    |  |   |    |   |
| 8272 | 8 | Dairy-products machine operators and workers           | - |    |  |   |    |   |
| 8311 | 8 | Locomotive engine drivers                              |   |    |  | - |    |   |
| 8312 | 8 | Railway brakemen, signallers and shunters              |   |    |  | - | -1 | - |
| 8320 | 8 | Car, taxi, motorcycle and van drivers                  |   | -1 |  |   | -1 |   |
| 8323 | 8 | Bus and tram drivers                                   |   |    |  |   |    |   |
| 8324 | 8 | Heavy truck and lorry drivers                          |   |    |  |   |    |   |
| 8332 | 8 | Earth-moving and related plant operators               |   |    |  |   |    |   |
| 8333 | 8 | Crane, hoist and related plant operators               |   |    |  |   |    | - |
| 8334 | 8 | Lifting-truck operators                                |   |    |  | - | -1 |   |
| 8340 | 8 | Ships' deck crews and related workers                  |   |    |  | - | -1 | - |
| 0031 | 9 | Watchpersons, meter readers and related workers        |   |    |  |   |    |   |
| 9110 | 9 | Street vendors and related workers                     |   |    |  |   |    |   |
| 9130 | 9 | Domestic helpers, cleaners and related workers         |   |    |  |   |    |   |
| 9140 | 9 | Vehicle, window and related cleaners                   |   |    |  | - |    |   |
| 9151 | 9 | Messengers, package and luggage porters and deliverers |   |    |  |   |    |   |
| 9160 | 9 | Garbage collectors and related labourers               |   |    |  | - |    |   |
| 9210 | 9 | Agricultural, fishery, forestry and related labourers  |   |    |  |   |    |   |
| 9310 | 9 | Mining and construction labourers                      |   |    |  |   |    |   |
| 9320 | 9 | Manufacturing and transport labourers                  |   |    |  |   |    |   |
| 9330 | 9 | Transport labourers and freight handlers               |   |    |  |   |    |   |
